# Supplementary material for: Defensin-like peptides in wheat analyzed by whole-transcriptome sequencing: a focus on structural diversity and role in induced resistance
Source: PeerJ. 2019 Jan 8;7:e6125. doi: 10.7717/peerj.6125 (PMC6329339; doi:10.7717/peerj.6125)
Supplement: Table S1 [file peerj-07-6125-s001.xlsx]

## Sheet: Лист1
Name	Pr_dir 5' --> 3'	Pr_rev 5' --> 3'	T primer annealing (℃)	Amino acid sequence
DEFL1-1	ATGGCGCTCTCTGGTCGCATG	ttgctgctgctgaggcacg	62	malsgrmaasallllvllvatemgaptrkvaeaRDCLSKSHKFKGACLSSSNCASICRTENFPGGECKLDSFARKCFCKRVC
DEFL1-10	ATGGGACGTGTCAAGGTGTC	ttagcactgtttttcgca	58	mgrvkvstlmflllhipvllvpgshtKICRVYSVSYTTPLCKPRQCVEACHKEGFPQGWCYILGTKYIIILCVCEKQC
DEFL1-16	ATGGAGGCTTCACGCAGGCT	ttaatggtggcagtgggtgg	58	measrrllsaalllvlllaatgelggpvmvaeaRTCESRSHRFRGPCVRRSNCANVCKTEGFPDGKCRGFRRRCFCTTHCHH
DEFL1-34	ATGGCGCTCTCTGGTCGCAT	ctagcagaccctcttgcagaa	60	malsgrmaasallllvllvatemgaptrkvaeaRDCLSKSHKFKGACISSSNCASICRTENFPGGECKLDSFARKCFCKRVC
DEFL1-48	ATGGCGCTCTCTCGTCGCAT	ttgctgctgctgaggcag	62	malsrrmaasallllvllvatemgattvklaeaRDCLSQNHKFKGACLSSSNCAAVCRTENFPDGECNSHRLERKCFCKRTC
DEFL(Fo)	ATGAAGATCAGCGCCTTCTT	ttaggtcttgcagcagcagc	63	mkisafflaatlasvmaasshvqepalearaacwnrsscgrawsgkcedyckpykfshmattdcgwlakrccckt
DEFL3-3	ATGCCACATTCCTCAGCCA	caaatcccacctccgcagc	62	mphssatrqvlfapgficllngicgNQEPYQVNCTQQGCVTACKKAGCGGGICHKDGSCNCL
DEFL3-5	ATGCTGCGTGCCGTGGCGGT	ctagcaatcacacaggctg	60	mlravavsvavglrllcmragalcVPCVLCMRVVCVHVTNRCASVGSLCDC
DEFL3-6	ATGTTGCTTCTTTTAATCAT	tcaaaaaaacaaaggacactg	52	mlllliicansllvryHQCSCKNRAGKAYSCISLCRSSHQIFCKPLVCQCPLFF
DEFL4-1	ATGCATGTACGAGCAAGCT	ttaaaactttgacttaagac	56	mhvrascmpvyllssvffflfegscsVSEEQLKASSTCSYLLCTVLPPSMNKCTSSFCLKSKF
DEFL4-8	ATGAAGCTGCAAACCCAACT	ttaacgcccgtggcagccgaa	56	mklqtqllllasitaalimscgvlaGTTHAIPVPTLRGIEDDDVGFAEREEAAYPRRRVLYGDQYISYKGVQASRPACSGSCAGRGQPYTGSGCQAIFGCHGR
DEFL4-14	ATGGGGGCGAGCAAGCTATT	tcagtgcgggcaccggtcctt	60	mgasklfraflagvlllllvvaaqlagaQHISYFPNRPACPNQCGAPGQSYTRGCTYKDRCPH
DEFL4-22	ATGGCGGTGAGCAAGCTT	tcaccgcggggagcaat	60	mavsklgpaaaflarillllvvvaqvaaGGPNIGLIPGSPACPHTCTNPQQSYTRSCLYADHCSPR
DEFL4-23	ATGTTTTTTCAGAATCTTATG	tcagaaatgccttggcatg	58	mffqnlmrhlhPWLLHVLKCAVDSCVLKLPQWGCLIITFCRVMPRHF
DEFL4-28	ATGAAGCTGCAAACGCAACT	ttaacgcccgtggcag	60	mklqtqllllasitarltmsrgvlaGGTHAMPMPALRGVDDDDVGFAEREEAAYPRRRVLYGDQYISYIGVHASRPACSGSCAGRGQPYTGSGCQAIFGCHGR
DEFL5-3	ATGGAAATCATTCTTTTATGGG	ttagcataggaaattg	52	meiillwvrlllcflvschildgIGNSAYTAWSKKLGSEHGMCCLRIPFCIINLPEVANVCFFNFLC
DEFL5-1	ATGCCAGCAATGCTGCTG	gaggaggagcttttgttg	63	mpamllrvpsillalilrsvarcQSTRGTGCRPAAAPTSLPWGHSSPTKAPPQMCRLICQGKVRLRPSMECPTAPCSFRIQVQHK
DEFL6-4	ATGGAACTACTTGCGGT	ctactgaatcagtctctcc	58	mellavpfvlmqtctaYLTWQIFLTNSQLEMEYCIQTRCCHSFPCASVKQARLACSHSLLCQTLERLIQ
DEFL6-7	ATGCATGTTTGCATGCTTGT	ttaacatgtgaacatctggc	60	mhvcmlvllslqsillllsнYPGCFVAINICPMFCFLACLLLQSILLLCQMFTC
DEFL7-1	ATGCCAACAATGCTGCTG	tcatttgcgccgcactcga	60	mptmllrvpsillalilrsaaRCQSTRGTGCRPAVALSSLPWGHCSSTRAPLMCKLICRGKVRLRPSMGCHTAPCSSRIRVRRK
DEFL8-1	ATGGGTTCTTCCAAGCGT	aaagagcacgcgtaggcgtc	56	mgsskrngsallclllagllllavtaVKVEAGWGCVDRCVEGGGADAYACSFVCIWNLRRDGGTGAGSSAKMRGEILPVELKGEREDCIERCMDLGLDFFECLFHVC
DEFL8-4	ATGCCAGCAATTCTGCTGCTG	tcatttgcgccgcactcg	58	mpailllvpsiflalilrlaaRRRCCQSTRGMGCPRAAAPSSPPWGHCSSTRAPLMCKLICRGKVRLRPSMGCHTAPCSSRIRVRRK
DEFL9-2	ATGGCGTCTGTGAAGCTC	tcacgcgtgcttgcacttg	60	masvklaaaalavvlacaalaatpaaaYQFEPEPCKKQAMYFKNCLPLVAEPEKCCSVVANPACFCEVEREVEIQCAPGHHCSRADKKVKIAEMNLPCLQNLKCKHA
DEFL10-1	ATGGCGTCCGTGAAGATC	ttctcgcactcactgacga	60	masvkiavvllacatlmataaaYAPYRPEPEPCKTQAMYFKNCLLLVSECEKCCTGVVADPACFCEVEREAEIQCAPGHHCSRADKKVKIAEMNLPCMKNLKCKRA
