# Supplementary material for: Defensin-like peptides in wheat analyzed by whole-transcriptome sequencing: a focus on structural diversity and role in induced resistance
Source: PeerJ. 2019 Jan 8;7:e6125. doi: 10.7717/peerj.6125 (PMC6329339; doi:10.7717/peerj.6125)
Supplement: Table S4 — DEFLs are designated as follows: the first figure indicates group number, the second, the number of group member. For example, DEFL1-1 means that this DEFL belongs to group 1, and it is the first group member. DEFLs with identical mature defensin domains are colored similarly. Signal peptides predicted by SignalP and by homology with cereal defensins for group 1 DEFLs are shown in low-case letters. Cysteine motifs characteristic to DEFL groups are presented before the sequences belonging to each group. Prediction of antimicrobial properties was performed with CS-AMPPred (Porto, Pires & Franco, 2012). Isoelectric point (PI) for each putative mature defensin was calculated using IPC tool (Kozlowski, 2016). Accession numbers, annotation and identity score for the top BLAST hits in the NCBI database are presented.*DEFL of F. oxisporum. [file peerj-07-6125-s004.xlsx]

## Sheet: Лист1
MOTIF: C[ABD-Z]{4,25}C[ABD-Z]{2,12}C[ABD-Z]{3,4}C[ABD-Z]{3,17}C[ABD-Z]{4,32}C[ABD-Z]C[ABD-Z]{1,6}C
#	Name	Signaling sequence {20,47}| mature sequence {46,60}	AMP prediction	pI calculated	BLAST homology (if present, the first hit is indicated)	Accession	% identity	Nucleotide sequence
1	DEFL1-1	malsgrmaasallllvllvatemgaptrkvaea RDCLSKSHKFKGACLSSSNCASICRTENFPGGECKLDSFARKCFCKRVC	AMP	8.278	defensin Tm-AMP-D1.2-like [Aegilops tauschii subsp. tauschii]	XP_020195731.1	98	ATGGCGCTCTCTGGTCGCATGGCCGCATCCGCCCTCCTCCTTCTGGTCCTCCTCGTCGCCACAGAGATGGGGGCGCCGACGAGGAAGGTGGCGGAGGCGCGGGACTGCCTGTCCAAGAGCCACAAGTTCAAGGGCGCGTGCCTCAGCAGCAGCAACTGCGCCAGCATCTGCCGCACCGAGAACTTCCCCGGCGGCGAGTGCAAGCTCGACTCCTTCGCGCGCAAGTGCTTCTGCAAGAGGGTCTGCTAG
2	DEFL1-2	masprrmaaapavlllllllvatemgtmktaea RTCQSQSHKFKGACFSDTNCASVCRTEKFPRGQCNTHYVERKCYCERDC	AMP	7.787	defensin Tm-AMP-D1.2-like [Aegilops tauschii subsp. tauschii]	XP_020172228.1	98	ATGGCCGCCGCGCCCGCCGTCCTCCTCCTGCTGCTCCTCCTCGTCGCCACGGAGATGGGGACGATGAAGACGGCGGAGGCCCGGACGTGCCAGTCGCAGAGCCACAAGTTCAAGGGCGCCTGCTTCAGCGACACCAACTGCGCCAGCGTGTGCCGCACCGAGAAGTTCCCCCGCGGCCAGTGCAACACGCACTACGTCGAGCGCAAGTGCTACTGCGAGCGGGACTGCTGA
3	DEFL1-3	masprrmataapavlllvlllvatemgtlktaea RTCLSQSHKFKGTCISDSNCAGVCRTENFPDGECNSHRLERKCFCKRTC	AMP	7.897	defensin [Triticum aestivum]	AFQ69079.1	96	ATGGCGTCCCCTCGTCGCATGGCCACGGCCGCGCCCGCCGTCCTCCTCCTCGTCCTGCTCCTCGTCGCCACAGAGATGGGGACTCTGAAGACAGCGGAGGCCCGGACGTGCCTGTCGCAGAGCCACAAGTTCAAGGGCACCTGCATCAGCGACAGCAACTGCGCCGGCGTGTGCCGCACCGAGAACTTCCCCGACGGCGAGTGCAACTCCCACCGCCTCGAGCGCAAGTGCTTCTGCAAGCGGACCTGCTAA
4	DEFL1-4	maspsrtaatpavlllllllvatemgttkvvea RTCLSQSHKFKGTCISDSNCAGVCRTENFPDGECNSHRLERKCFCKRTC	AMP	7.897	defensin Tk-AMP-D2-like [Aegilops tauschii subsp. tauschii]	XP_020172230.1	99	ATGGCGTCCCCAAGTCGCACGGCCGCCACGCCCGCCGTCCTCCTGCTCCTGCTCCTGCTCGTCGCCACAGAGATGGGGACGACCAAGGTGGTGGAGGCCCGGACGTGCCTGTCTCAGAGCCACAAGTTCAAGGGCACCTGCATCAGCGACAGCAACTGCGCCGGCGTGTGCCGCACCGAGAACTTCCCCGACGGCGAGTGCAACTCCCACCGCCTCGAGCGCAAGTGCTTCTGCAAGCGGACCTGCTAA
5	DEFL1-5	maspsrtaatpavlllllllvatemgttkvvea RTCLSQSHKFKGTCISDSNCAGVCRTENFPDGECNTHLVERKCYCKRTC	AMP	7.6	defensin Tk-AMP-D2-like [Aegilops tauschii subsp. tauschii]	XP_020172230.1	94	ATGGCGTCCCCAAGTCGCACGGCCGCCACGCCCGCCGTCCTCCTGCTCCTGCTCCTGCTCGTCGCCACAGAGATGGGGACGACCAAGGTGGTGGAGGCCCGGACGTGCCTGTCTCAGAGCCACAAGTTCAAGGGCACCTGCATCAGCGACAGCAACTGCGCCGGCGTGTGCCGCACCGAGAACTTCCCCGACGGCGAGTGCAACACGCACCTCGTCGAGCGCAAGTGCTACTGCAAGCGGACCTGCTAA
6	DEFL1-6	malsrrmaasallllvllvatemgattvklaea RDCLSQNHKFKGACLSSSNCAAVCRTENFPDGECHTHNFARKCFCKRAC	AMP	7.902	defensin [Triticum aestivum]	AIA66989.1	99	ATGGCGCTCTCTCGTCGCATGGCTGCGTCCGCCCTCCTGCTGCTGGTCCTCCTCGTCGCCACAGAGATGGGGGCGACGACGGTCAAGCTGGCTGAGGCGCGGGACTGCCTGTCCCAGAACCACAAGTTCAAGGGCGCCTGCCTCAGCAGCAGCAACTGCGCCGCCGTCTGCCGCACCGAGAACTTCCCCGACGGGGAGTGCCACACGCACAACTTCGCCCGCAAGTGCTTCTGCAAGAGGGCCTGCTAG
7	DEFL1-7	mestsrhmvasvllvllllvatemgAttvklaea RDCLSQNHKFKGACLSSSNCAAVCRTENFPDGECHTHNFARKCFCKRAC	AMP	7.902	defensin [Triticum aestivum]	AIA66989.1	92	ATGGAGTCGACCTCTCGCCATATGGTTGCGTCCGTCCTCTTGGTCCTTCTCCTCCTCGTCGCCACAGAGATGGGGGCGACGACGGTCAAGCTGGCTGAGGCGCGGGACTGCCTGTCCCAGAACCACAAGTTCAAGGGCGCCTGCCTCAGCAGCAGCAACTGCGCCGCCGTCTGCCGCACCGAGAACTTCCCCGACGGGGAGTGCCACACGCACAACTTCGCCCGCAAGTGCTTCTGCAAGAGGGCCTGCTAG
8	DEFL1-8	mafsrrmaasallllvllvatemgattvklaea RDCLSQNHKFKGACLSSSNCAAVCRTENFPDGECHTHNFARKCFCKRAC	AMP	7.902	defensin [Triticum aestivum]	AIA66989.1	98	ATGGCGTTCTCTCGTCGCATGGCCGCGTCCGCCCTCCTGCTGCTGGTCCTCCTCGTCGCCACAGAGATGGGGGCGACGACGGTCAAGCTGGCTGAGGCGCGGGACTGCCTGTCCCAGAACCACAAGTTCAAGGGCGCCTGCCTCAGCAGCAGCAACTGCGCCGCCGTCTGCCGCACCGAGAACTTCCCCGACGGGGAGTGCCACACGCACAACTTCGCCCGCAAGTGCTTCTGCAAGAGGGCCTGCTAG
9	DEFL1-9	maltrrmaasallllvllvatemgattvklaea RDCLSQNHKFKGACLSSSNCAAVCRTENFPDGECHTHNFARKCFCKRAC	AMP	7.902	defensin [Triticum aestivum]	AIA66989.1	98	ATGGCGCTCACTCGTCGCATGGCCGCATCCGCCCTCCTCCTTCTGGTCCTCCTCGTCGCCACAGAGATGGGGGCGACGACGGTCAAGCTGGCTGAGGCGCGGGACTGCCTGTCCCAGAACCACAAGTTCAAGGGCGCCTGCCTCAGCAGCAGCAACTGCGCCGCCGTCTGCCGCACCGAGAACTTCCCCGACGGGGAGTGCCACACGCACAACTTCGCCCGCAAGTGCTTCTGCAAGAGGGCCTGCTAG
10	DEFL1-10	mgrvkvstlmflllhipvllvpgsht KICRVYSVSYTTPLCKPRQCVEACHKEGFPQGWCYILGTKYIIILCVCEKQC	AMP	7.656	hypothetical protein TRIUR3_13487 [Triticum urartu]	EMS52166.1	61	ATGGGACGTGTCAAGGTGTCAACTCTGATGTTCCTTCTACTACACATTCCAGTTCTTTTAGTTCCTGGCTCACATACCAAGATATGCAGAGTATACAGCGTGAGCTATACCACCCCTTTATGCAAGCCGCGTCAATGTGTTGAGGCATGCCACAAGGAGGGGTTTCCCCAAGGGTGGTGTTACATATTAGGTACTAAATACATTATAATTTTGTGTGTGTGCGAAAAACAGTGCTAA
11	DEFL1-11	mlvllllssydgggvgvaea RICTGKSQHHSFPCISDKSCTKTCLGEHGAKWTAGYCKISRCTCQREC	AMP	7.983	defensin-like protein 1 [Aegilops tauschii subsp. tauschii]	XP_020155345.1	96	ATGCTGGTGCTGCTCCTGCTTTCCTCATACGACGGCGGAGGCGTCGGTGTGGCGGAGGCGCGCATTTGCACGGGGAAGAGCCAGCACCACTCGTTCCCGTGCATCTCGGACAAGAGCTGCACCAAGACGTGCCTCGGCGAGCACGGCGCAAAATGGACGGCCGGCTACTGCAAAATCAGCCGCTGCACCTGCCAGAGGGAGTGCTAG
12	DEFL1-12	mwtkkvatqvalvllllliaqeaavpgaea KICRQRSAGFKGPCLSDKNCAQVCLQERWGGGNCDGPFRRCKCIRQC	AMP	8.544	defensin [Triticum aestivum]	AIA67007.1	96	ATGTGGACCAAGAAGGTGGCGACGCAGGTGGCTTTGGTCCTGCTTCTCCTCCTCATCGCACAGGAGGCGGCGGTGCCGGGGGCGGAGGCGAAGATCTGCCGGCAGCGCAGCGCGGGGTTCAAGGGGCCGTGCCTGTCCGATAAGAACTGCGCGCAGGTCTGCCTGCAGGAACGCTGGGGCGGCGGCAACTGCGACGGGCCCTTCCGCCGGTGCAAGTGCATCAGGCAGTGCTGA
13	DEFL1-13	mratqvlflalallmlasdvvteasmdgsvki LRCAATSIPSPQPCDNFTCELACFNLIKLPKQGKCTDFQCKCMICEDTPPLSGWKLAKVG	AMP	7.323	hypothetical protein TRIUR3_21793 [Triticum urartu]	EMS53432.1	75	ATGTGGACCAAGAAGGTGGCGACGCAGGTGGCTTTGGTCCTGCTTCTCCTCCTCATCGCACAGGAGGCGGCGGTGCCGGGGGCGGAGGCGAAGATCTGCCGGCAGCGCAGCGCGGGGTTCAAGGGGCCGTGCCTGTCCGATAAGAACTGCGCGCAGGTCTGCCTGCAGGAACGCTGGGGCGGCGGCAACTGCGACGGGCCCTTCCGCCGGTGCAAGTGCATCAGGCAGTGCTGA
14	DEFL1-14	maalklklmvppagfclllllmpplllppgcaatrpdptqgpsegnn RTCTELSKRSPILYCEHHACVDNCRIEGFAEGGFCNWLRCLCKRPC	AMP	7.306	hypothetical protein TRIUR3_01199 [Triticum urartu]	EMS59557.1	98	ATGGCGGCACTCAAGCTCAAGCTCATGGTGCCACCGGCAGGCTTTTGCTTGCTTCTACTGCTCATGCCACCACTCCTACTTCCTCCTGGATGTGCTGCCACTCGTCCTGATCCCACCCAAGGGCCATCTGAGGGCAACAACAGGACATGCACGGAGCTGAGCAAGAGGAGCCCCATCCTCTACTGCGAGCACCACGCATGCGTCGACAACTGCCGCATCGAGGGCTTCGCCGAGGGAGGGTTTTGCAACTGGCTGCGCTGCCTCTGCAAGAGGCCCTGCTGA
15	DEFL1-15	measrrllsaalllvlllaatgelggpvmvaea RTCESRSHRFRGPCVRRSNCANVCRTEGFSDGKCRGFRRRCFCTTHCHH	AMP	9.93	defensin Ec-AMP-D2-like [Aegilops tauschii subsp. tauschii]	XP_020164918.1	100	ATGGAGGCTTCACGCAGGCTCCTCTCGGCGGCGCTCCTCCTCGTGCTGCTGCTCGCCGCCACAGGGGAGCTGGGAGGCCCGGTGATGGTGGCGGAGGCGCGGACGTGCGAGTCGAGGAGCCACAGGTTCAGGGGGCCCTGCGTGCGCAGGTCCAACTGCGCCAACGTCTGCAGGACCGAGGGCTTCTCCGACGGCAAGTGCCGCGGGTTCCGCCGCCGCTGCTTCTGCACCACCCACTGCCACCATTAA
16	DEFL1-16	measrrllsaalllvlllaatgelggpvmvaea RTCESRSHRFRGPCVRRSNCANVCKTEGFPDGKCRGFRRRCFCTTHCHH	AMP	9.768	Defensin-like protein 1 [Triticum urartu]	EMS65298.1	100	ATGGAGGCTTCACGCAGGCTCCTCTCGGCGGCGCTCCTCCTCGTGCTGCTGCTCGCCGCCACAGGGGAGCTGGGAGGCCCGGTGATGGTGGCGGAGGCGCGGACGTGCGAGTCGAGGAGCCACAGGTTCAGGGGGCCCTGCGTGCGCAGGTCCAACTGCGCCAACGTCTGCAAGACCGAGGGCTTCCCCGACGGCAAGTGCCGCGGATTCCGACGCCGCTGCTTCTGCACCACCCACTGCCACCATTAA
17	DEFL1-17	maltrrmaasallllvllvatemgtlktaea RTCLSQSHKFKGTCLSNSNCAGVCRTENFPDGECNTHLVERKCYCKRTC	AMP	7.795	defensin [Triticum aestivum]	BAC10287.1	85	ATGGCGCTCACTCGTCGCATGGCCGCATCCGCCCTCCTCCTTCTGGTCCTCCTCGTCGCCACAGAGATGGGGACTCTGAAGACAGCGGAGGCCCGGACGTGCCTGTCGCAGAGCCACAAGTTCAAGGGCACCTGCCTCAGCAACAGCAACTGCGCCGGCGTGTGCCGCACCGAGAACTTCCCCGACGGCGAGTGCAACACGCACCTCGTCGAGCGCAAGTGCTACTGCAAGCGGACCTGCTAA
18	DEFL1-18	masprrmaaapavlllvlllvatemgtmktaea RTCLSQSHKFKGTCLSNSNCAGVCRTENFPDGECNTHLVERKCYCKRTC	AMP	7.795	defensin [Triticum aestivum]	BAC10287.1	96	ATGGCGTCCCCTCGTCGCATGGCCGCCGCGCCCGCCGTCCTCCTCCTCGTCCTGCTCCTCGTCGCCACAGAGATGGGGACGATGAAGACGGCGGAGGCCCGGACGTGCCTGTCCCAGAGCCACAAGTTCAAGGGCACCTGCCTCAGCAACAGCAACTGCGCCGGCGTGTGCCGCACCGAGAACTTCCCCGACGGCGAGTGCAACACGCACCTCGTCGAGCGCAAGTGCTACTGCAAGCGGACCTGCTAA
19	DEFL1-19	masprrmaaaaaalllvllllvatemgtmktaea RTCLSQSHKFKGTCLSNSNCAGVCRTENFPDGECNTHLVERKCYCKRTC	AMP	7.795	defensin [Triticum aestivum]	AIA66993.1	93	ATGGCGTCCCCTCGTCGCATGGCCGCCGCGGCCGCTGCCCTCCTCCTTGTCCTGCTCCTCCTCGTCGCCACGGAGATGGGGACGATGAAGACGGCGGAGGCCCGGACGTGCCTGTCGCAGAGCCACAAGTTCAAGGGCACCTGCCTCAGCAACAGCAACTGCGCCGGCGTGTGCCGCACCGAGAACTTCCCCGACGGCGAGTGCAACACGCACCTCGTCGAGCGCAAGTGCTACTGCAAGCGGACCTGCTAA
20	DEFL1-20	masprrmaaapavlllllllvatemgtmktaea RTCLSQSHKFKGTCLSNSNCAGVCRTENFPDGECNTHLVERKCYCKRTC	AMP	7.795	defensin [Triticum aestivum]	BAC10287.1	98	ATGGCGTCCCCTCGTCGCATGGCCGCCGCGCCCGCCGTCCTCCTCCTGCTGCTCCTCCTCGTCGCCACGGAGATGGGGACGATGAAGACGGCGGAGGCCCGGACGTGCCTGTCCCAGAGCCACAAGTTCAAGGGCACCTGCCTCAGCAACAGCAACTGCGCCGGCGTGTGCCGCACCGAGAACTTCCCCGACGGCGAGTGCAACACGCACCTCGTCGAGCGCAAGTGCTACTGCAAGCGGACCTGCTAA
21	DEFL1-21	mastrrmaaapavlllllllvatemgtmktaea RTCLSQSHKFKGTCLSNSNCAGVCRTENFPDGECNTHLVERKCYCKRTC	AMP	7.795	defensin [Triticum aestivum]	BAC10287.1	99	ATGGCGTCCACTCGTCGCATGGCTGCCGCGCCGGCCGTCCTCCTTCTCCTCCTCCTGCTCGTCGCCACAGAGATGGGGACGATGAAGACGGCGGAGGCCCGGACGTGCCTGTCCCAGAGCCACAAGTTCAAGGGCACCTGCCTCAGCAACAGCAACTGCGCCGGCGTGTGCCGCACCGAGAACTTCCCCGACGGCGAGTGCAACACGCACCTCGTCGAGCGCAAGTGCTACTGCAAGCGGACCTGCTAA
22	DEFL1-22	mastsrrmvasvllvllllvatemetmrvaearhgh RHCESQSHRYRGACWRDDNCKHVCNTEGFPWGKCKFHDFERKCFCKKPC	AMP	8.086	defensin precursor [Triticum turgidum subsp. durum]	ACV84383.1	96	ATGGCGTCGACCTCTCGCCGTATGGTTGCGTCCGTCCTCTTGGTCCTTCTTCTCCTCGTCGCCACAGAGATGGAGACGATGAGGGTGGCGGAGGCGAGGCACGGGCACAGGCACTGCGAGTCGCAGAGCCACAGGTACCGCGGAGCGTGCTGGAGGGACGACAACTGCAAGCACGTCTGCAACACCGAGGGCTTCCCTTGGGGCAAGTGCAAGTTCCACGACTTCGAAAGGAAGTGCTTCTGCAAGAAACCGTGCTAG
23	DEFL1-23	masprrmaaapavlllllllvatemgtmktaea RTCLSQSHKFKGTCLSNSNCAGVCRTENFPDGECNSHRLERKCYCKRTC	AMP	8.056	defensin Tk-AMP-D2-like [Aegilops tauschii subsp. tauschii]	XP_020172227.1	100	ATGGCGTCCCCTCGTCGCATGGCCGCCGCGCCCGCCGTCCTCCTCCTGCTGCTCCTCCTCGTCGCCACGGAGATGGGGACGATGAAGACGGCGGAGGCCCGGACGTGCCTGTCCCAGAGCCACAAGTTCAAGGGCACCTGCCTCAGCAACAGCAACTGCGCCGGCGTGTGCCGCACCGAGAACTTCCCCGACGGCGAGTGCAACTCCCACCGCCTCGAGCGCAAGTGCTACTGCAAGCGGACCTGCTAA
24	DEFL1-24	masprrmaaaaaalllvllllvatemgttktaea RTCESQSHKFKGACFSDTNCASVCRTEKFPRGQCNTHYVERKCYCERDC	AMP	7.595	defensin Tk-AMP-D2 [Aegilops tauschii subsp. tauschii]	XP_020172235.1	87	ATGGCGTCCCCTCGTCGCATGGCCGCCGCGGCCGCTGCCCTCCTCCTTGTCCTGCTCCTCCTCGTCGCCACGGAGATGGGGACGACGAAGACGGCGGAAGCCCGGACGTGCGAGTCCCAGAGCCACAAGTTCAAGGGCGCCTGCTTCAGCGACACCAACTGCGCCAGCGTGTGCCGCACCGAGAAGTTCCCCCGCGGCCAGTGCAACACGCACTACGTCGAGCGCAAGTGCTACTGCGAGCGGGACTGCTAA
25	DEFL1-25	masprrmataapavlllvlllvatemgtlktaea RTCLSQSHKFKGACFSDTNCASVCRTEKFPRGQCNTHYVERKCYCERDC	AMP	7.787	defensin Tm-AMP-D1.2-like [Aegilops tauschii subsp. tauschii]	XP_020172228.1	95	ATGGCGTCCCCTCGTCGCATGGCCACGGCCGCGCCCGCCGTCCTCCTCCTCGTCCTGCTCCTCGTCGCCACAGAGATGGGGACTCTGAAGACAGCGGAGGCCCGGACGTGCCTGTCGCAGAGCCACAAGTTCAAGGGCGCCTGCTTCAGCGACACCAACTGCGCCAGCGTGTGCCGCACCGAGAAGTTCCCCCGCGGCCAGTGCAACACGCACTACGTCGAGCGCAAGTGCTACTGCGAGCGGGACTGCTGA
26	DEFL1-26	masprrmaaapavlllllllvatemgtmktaea RTCLSQSHKFKGACFSDTNCASVCRTEKFPRGQCNTHYVERKCYCERDC	AMP	7.787	defensin Tm-AMP-D1.2-like [Aegilops tauschii subsp. tauschii]	XP_020172228.1	96	ATGGCGTCCCCTCGTCGCATGGCCGCCGCGCCCGCCGTCCTCCTCCTGCTGCTCCTCCTCGTCGCCACGGAGATGGGGACGATGAAGACGGCGGAGGCCCGGACGTGCCTGTCGCAGAGCCACAAGTTCAAGGGCGCCTGCTTCAGCGACACCAACTGCGCCAGCGTGTGCCGCACCGAGAAGTTCCCCCGCGGCCAGTGCAACACGCACTACGTCGAGCGCAAGTGCTACTGCGAGCGGGACTGCTGA
27	DEFL1-27	maaapavlllvlllvatemgtmktaea RTCLSQSHKFKGACFSDTNCASVCRTEKFPRGQCNTHYVERKCYCERDC	AMP	7.787	defensin Tm-AMP-D1.2-like [Aegilops tauschii subsp. tauschii]	XP_020172228.1	99	ATGGCCGCCGCGCCCGCCGTCCTCCTCCTCGTCCTGCTCCTCGTCGCCACAGAGATGGGGACGATGAAGACGGCGGAGGCCCGGACGTGCCTGTCGCAGAGCCACAAGTTCAAGGGCGCCTGCTTCAGCGACACCAACTGCGCCAGCGTGTGCCGCACCGAGAAGTTCCCCCGCGGCCAGTGCAACACGCACTACGTCGAGCGCAAGTGCTACTGCGAGCGGGACTGCTGA
28	DEFL1-28	masprrmaaapavlllvlllvatemgtmktaea RTCLSQSHKFKGACFSDTNCASVCRTEKFPRGQCNTHYVERKCYCERDC	AMP	7.787	defensin Tm-AMP-D1.2-like [Aegilops tauschii subsp. tauschii]	XP_020172228.1	98	ATGGCGTCCCCTCGTCGCATGGCCGCCGCGCCCGCCGTCCTCCTCCTCGTCCTGCTCCTCGTCGCCACAGAGATGGGGACGATGAAGACGGCGGAGGCCCGGACGTGCCTGTCCCAGAGCCACAAGTTCAAGGGCGCCTGCTTCAGCGACACCAACTGCGCCAGCGTGTGCCGCACCGAGAAGTTCCCCCGCGGCCAGTGCAACACGCACTACGTCGAGCGCAAGTGCTACTGCGAGCGGGACTGCTGA
29	DEFL1-29	mrihrivaylpsllvmpkemgdlkvpsllcllllmplllvpgsea DTCSKFSKTYTGRASLCKYAPCAKACQKEGFTEGVCAVIRARPLFMRCLCKKKC	AMP	9.016	hypothetical protein F775_24048 [Aegilops tauschii]	EMT08033.1	95	ATGCGCATCCATCGTATAGTCGCTTACTTGCCGTCGTTACTGGTTATGCCTAAAGAGATGGGAGACCTCAAGGTGCCAAGCCTGCTATGCTTGCTGCTGCTCATGCCACTCCTCTTGGTTCCTGGCTCTGAAGCCGACACATGCAGCAAGTTCAGCAAGACCTATACCGGCAGGGCTTCCTTATGCAAGTATGCTCCATGTGCCAAGGCCTGCCAGAAGGAGGGCTTTACCGAAGGGGTGTGTGCCGTGATCCGCGCCAGACCCCTTTTTATGCGTTGTCTCTGCAAGAAAAAGTGCTAA
30	DEFL1-30	mkttqallllslalmllssggtrrtasaaegggvvvpa ADCSGTVIRRGEACEPRNCEAECRRQYGGLGACAALGCSCALCVKYPRPPSSVAQGN	AMP	7.231	predicted protein [Hordeum vulgare subsp. vulgare]	BAK03872.1	63	ATGAAGACCACACAGGCCCTGCTCCTGCTCTCCCTAGCCCTCATGCTGCTATCATCAGGTGGTACACGACGCACGGCGTCTGCGGCAGAGGGTGGCGGCGTCGTGGTGCCGGCGGCGGACTGCTCGGGGACGGTGATCAGGCGGGGCGAGGCGTGTGAGCCCCGGAACTGCGAGGCGGAGTGCCGGAGGCAGTACGGCGGGTTGGGCGCGTGCGCCGCCTTGGGGTGCAGCTGCGCCTTGTGCGTCAAGTACCCTCGGCCTCCCTCCTCCGTCGCACAAGGAAACTGA
31	DEFL1-31	mastrrmaaapavlllllllvatemgtmktaea RTCLSQSHKFKGTCLSNSNCAGVCRTENFPDGECNSHRLERKCFCKRTC	AMP	8.089	defensin Tk-AMP-D2-like [Aegilops tauschii subsp. tauschii]	XP_020172227.1	98	ATGGCGTCCACTCGTCGCATGGCTGCCGCGCCGGCCGTCCTCCTTCTCCTCCTCCTGCTCGTCGCCACAGAGATGGGGACGATGAAGACGGCGGAGGCCCGGACGTGCCTGTCCCAGAGCCACAAGTTCAAGGGCACCTGCCTCAGCAACAGCAACTGCGCCGGCGTGTGCCGCACCGAGAACTTCCCCGACGGCGAGTGCAACTCCCACCGCCTCGAGCGCAAGTGCTTCTGCAAGCGGACCTGCTAA
32	DEFL1-32	mlvllllssydgggvgvaea RICTGKSQHHSFPCISDKSCTKTCLGEHGAKWTAGYCKFRRCTCQREC	AMP	8.253	defensin [Triticum aestivum]	AIA67001.1	97	ATGCTGGTGCTGCTCCTGCTTTCCTCATACGACGGCGGAGGCGTCGGTGTGGCGGAGGCGCGCATTTGCACGGGGAAGAGCCAGCACCACTCGTTCCCGTGCATCTCGGACAAGAGCTGCACCAAGACGTGCCTCGGCGAGCACGGCGCAAAATGGACGGCCGGCTACTGCAAATTCAGGCGCTGCACCTGCCAGAGGGAGTGCTAG
33	DEFL1-33	mestsrhmvasvllvllllvatemetmrvaearhgh RHCESQSHRYRGACWRDDNCKHVCNTEGFPSGKCKFHGFESKCVCTKPCQ	AMP	8.071	defensin Ec-AMP-D1-like [Aegilops tauschii subsp. tauschii]	XP_020158853.1	95	ATGGAGTCGACCTCTCGCCATATGGTTGCGTCCGTCCTCTTGGTCCTTCTTCTCCTCGTCGCCACAGAGATGGAGACGATGAGGGTGGCGGAGGCGAGGCACGGGCACAGGCACTGCGAGTCGCAGAGCCACAGGTACCGCGGAGCGTGCTGGAGGGACGACAACTGCAAGCACGTCTGCAACACCGAGGGCTTCCCCTCGGGCAAGTGCAAGTTCCACGGCTTCGAAAGCAAGTGCGTCTGCACGAAACCCTGCCAGTAG
34	DEFL1-34	malsgrmaasallllvllvatemgaptrkvaea RDCLSKSHKFKGACISSSNCASICRTENFPGGECKLDSFARKCFCKRVC	AMP	7.86	defensin Tm-AMP-D1.2-like [Aegilops tauschii subsp. tauschii]	XP_020195731.1	96	ATGGCGCTCTCTGGTCGCATGGCCGCATCCGCCCTCCTCCTTCTGGTCCTCCTCGTCGCCACAGAGATGGGGGCGCCGACGAGGAAGGTGGCGGAGGCGCGGGACTGCCTGTCCAAGAGCCACAAGTTCAAGGGCGCGTGCATCAGCAGCAGCAACTGCGCCAGCATCTGCCGCACCGAGAACTTCCCCGGCGGCGAGTGCAAGCTCGACTCCTTCGCGCGCAAGTGCTTCTGCAAGAGGGTCTGCTAG
35	DEFL1-35	malsrrmaasallllvllvatemgattvklaea RDCLSQNHKFKGACISSSNCAGVCRTENFPDGECHTHNFARKCFCKRAC	AMP	8.29	defensin [Triticum aestivum]	AIA66989.1	96	ATGGGGGCGACGACGGTCAAGCTGGCTGAGGCGCGGGACTGCCTGTCCCAGAACCACAAGTTCAAGGGCGCCTGCATCAGCAGCAGCAACTGCGCCGGCGTGTGCCGCACCGAGAACTTCCCCGACGGGGAGTGCCACACGCACAACTTCGCCCGCAAGTGCTTCTGCAAGAGGGCCTGCTAG
36	DEFL1-36	malsrrmaasallllvllvatetgattvkvaea RDCLSQSHKFKGACISSSNCAGVCRTENFPDGECHTHNFARKCFCKRAC	AMP	7.886	defensin [Triticum aestivum]	AIA66994.1	90	ATGGCGCTCTCTCGTCGCATGGCCGCCTCCGCCCTCCTGCTGCTGGTCCTCCTCGTCGCCACAGAGACGGGGGCGACGACGGTCAAGGTGGCGGAGGCGCGGGACTGTCTGTCGCAGAGCCACAAGTTCAAGGGCGCGTGCATCAGCAGCAGCAACTGCGCCGGCGTGTGCCGCACCGAGAACTTCCCCGACGGGGAGTGCCACACGCACAACTTCGCCCGCAAGTGCTTCTGCAAGAGGGCCTGCTAG
37	DEFL1-37	mafsrrmaasallllvllvatemgattvea RDCLSQSHKFKGACISSSNCAGVCRTENFPDGECHTHNFARKCFCKRVC	AMP	7.886	defensin [Triticum aestivum]	AIA66994.1	88	ATGGCGTTCTCTCGTCGCATGGCCGCGTCCGCCCTCCTGCTGCTGGTCCTCCTCGTCGCCACAGAGATGGGGGCGACGACGGTGGAGGCGCGGGACTGCCTGTCGCAGAGCCACAAGTTCAAGGGCGCGTGCATCAGCAGCAGCAACTGCGCCGGCGTGTGCCGCACCGAGAACTTCCCCGACGGCGAGTGCCACACGCACAACTTCGCGCGCAAGTGCTTCTGCAAGAGGGTCTGCTAG
38	DEFL1-38	mastrrmaaapavlllllllvatemgttrtktaea RDCLSQSHKFKGACISSSNCAGVCRTENFPDGECHTHNFARKCFCKRVC	AMP	7.886	defensin Tm-AMP-D1.2-like [Aegilops tauschii subsp. tauschii]	XP_020198482.1	92	ATGGCGTCCACTCGTCGCATGGCTGCCGCGCCGGCCGTCCTCCTTCTCCTCCTCCTGCTCGTCGCCACAGAGATGGGGACGACGAGGACCAAGACGGCGGAGGCGCGGGACTGCCTGTCGCAGAGCCACAAGTTCAAGGGCGCGTGCATCAGCAGCAGCAACTGCGCCGGCGTGTGCCGCACCGAGAACTTCCCCGACGGCGAGTGCCACACGCACAACTTCGCGCGCAAGTGCTTCTGCAAGAGGGTCTGCTAG
39	DEFL1-39	malsrrmaasallllvllvatetgattvkvaea RDCLSQSHKFKGACISSSNCAGVCRTENFPDGECHTHNFARKCFCKRVC	AMP	7.886	defensin [Triticum aestivum]	AIA66994.1	89	ATGGCGCTCTCTCGTCGCATGGCCGCCTCCGCCCTCCTGCTGCTGGTCCTCCTCGTCGCCACAGAGACGGGGGCGACGACGGTCAAGGTGGCGGAGGCGCGGGACTGTCTGTCGCAGAGCCACAAGTTCAAGGGCGCGTGCATCAGCAGCAGCAACTGCGCCGGCGTGTGCCGCACCGAGAACTTCCCCGACGGCGAGTGCCACACGCACAACTTCGCGCGCAAGTGCTTCTGCAAGAGGGTCTGCTAG
40	DEFL1-40	masprrmaaapavlllllllvatemgtmktaea RTCLSQSHKFKGTCLSNSNCAGVCRTENFPDGECNSHRLERKCFCKRTC	AMP	8.089	defensin Tk-AMP-D2-like [Aegilops tauschii subsp. tauschii]	XP_020172227.1	99	ATGGCGTCCCCTCGTCGCATGGCCGCCGCGCCCGCCGTCCTCCTCCTGCTGCTCCTCCTCGTCGCCACGGAGATGGGGACGATGAAGACGGCGGAGGCCCGGACGTGCCTGTCCCAGAGCCACAAGTTCAAGGGCACCTGCCTCAGCAACAGCAACTGCGCCGGCGTGTGCCGCACCGAGAACTTCCCCGACGGCGAGTGCAACTCCCACCGCCTCGAGCGCAAGTGCTTCTGCAAGCGGACCTGCTAA
41	DEFL1-41	mwtkkvatqvvlvllllliaqeaavpgaea KICRQRSAGFKGPCVSDENCAQVCLQERWGGGNCDGPFRRCKCIRQC	AMP	8.082	defensin-like protein 2 [Aegilops tauschii subsp. tauschii]	XP_020155344.1	97	ATGTGGACCAAGAAGGTGGCGACGCAGGTGGTTTTGGTGCTGCTTCTCCTCCTCATCGCACAGGAGGCGGCGGTGCCGGGGGCGGAGGCGAAGATCTGCCGGCAGCGCAGCGCGGGGTTCAAGGGGCCATGCGTGTCGGACGAGAACTGCGCGCAGGTCTGCCTGCAGGAACGCTGGGGCGGCGGCAACTGCGACGGGCCCTTCCGCCGGTGCAAGTGCATCAGGCAGTGCTGA
42	DEFL1-42	mratqvlflalallmlasdvvteasmdgsvki LRCAATNIPSPQPCDNFTCELACFNLIKLPKQGKCTDFQCKCMICEDTPPLSGWKLAKVG	AMP	7.323	hypothetical protein F775_07133 [Aegilops tauschii]	EMT00019.1	95	ATGAGGGCTACACAGGTGTTGTTCCTGGCCCTCGCCTTACTCATGCTAGCATCAGATGTGGTAACAGAGGCGTCAATGGATGGTAGCGTTAAAATCTTGAGGTGTGCGGCAACCAATATACCATCACCACAGCCATGTGACAACTTCACTTGCGAACTGGCATGCTTCAACCTTATAAAGCTGCCCAAACAAGGAAAGTGTACTGATTTCCAATGTAAGTGCATGATATGCGAAGACACCCCTCCACTAAGTGGGTGGAAACTAGCTAAGGTAGGATGA
43	DEFL1-43	mwtkkvatqvvlvllllliaqeaavpgaea KICRQRSAGFKGPCLSDKNCAQVCQQEHWGGGNCDGPFRRCKCIRQC	AMP	8.291	defensin [Triticum aestivum]	AIA67007.1	94	ATGTGGACCAAGAAGGTGGCGACGCAGGTGGTTTTGGTGCTGCTTCTCCTCCTCATCGCACAGGAGGCGGCGGTGCCGGGGGCGGAGGCGAAGATCTGCCGGCAGCGCAGCGCGGGGTTCAAGGGGCCGTGCCTGTCCGATAAGAACTGCGCGCAGGTCTGCCAGCAAGAACACTGGGGCGGCGGCAACTGCGACGGGCCCTTCCGCCGGTGCAAGTGCATCAGGCAGTGCTGA
44	DEFL1-44	mastsrrmvasvllvllllvatemetmrvaearhgh RHCESQSHRYRGACWRDDNCEHVCNTEGFPWGKCKFHDFERKCFCKKPC	AMP	7.703	defensin precursor [Triticum turgidum subsp. durum]	ACV84383.1	98	ATGGCGTCGACCTCTCGCCGTATGGTTGCGTCCGTCCTCTTGGTCCTTCTTCTCCTCGTCGCCACAGAGATGGAGACGATGAGGGTGGCGGAGGCGAGGCACGGGCACAGGCACTGCGAGTCGCAGAGCCACAGGTACCGCGGAGCGTGCTGGAGGGACGACAACTGCGAACACGTCTGCAACACCGAGGGCTTCCCTTGGGGCAAGTGCAAGTTCCACGACTTCGAAAGGAAGTGCTTCTGCAAGAAACCGTGCTAG
45	DEFL1-45	malsrrmaasallllvllvatemgattvklaea RDCLSQNHKFKGACLSSSNCAAVCRTENFPDGECNTHLVERKCYCKRTC	AMP	7.6	defensin Tm-AMP-D1.2-like [Aegilops tauschii subsp. tauschii]	XP_020198481.1	82	ATGGCGCTCTCTCGTCGCATGGCTGCGTCCGCCCTCCTGCTGCTGGTCCTCCTCGTCGCCACAGAGATGGGGGCGACGACGGTCAAGCTGGCTGAGGCGCGGGACTGCCTGTCCCAGAACCACAAGTTCAAGGGCGCCTGCCTCAGCAGCAGCAACTGCGCCGCCGTCTGCCGCACCGAGAACTTCCCCGACGGCGAGTGCAACACGCACCTCGTCGAGCGCAAGTGCTACTGCAAGCGGACCTGCTAA
46	DEFL1-46	mafsrrmaasallllvllvatemgattvea RDCLSQSHKFKGACISSSNCAGVCRTENFPDGECHTHNFARKCFCKRAC	AMP	7.886	defensin [Triticum aestivum]	AIA66989.1	93	ATGGCGTTCTCTCGTCGCATGGCCGCGTCCGCCCTCCTGCTGCTGGTCCTCCTCGTCGCCACAGAGATGGGGGCGACGACGGTGGAGGCGCGGGACTGCCTGTCGCAGAGCCACAAGTTCAAGGGCGCGTGCATCAGCAGCAGCAACTGCGCCGGCGTGTGCCGCACCGAGAACTTCCCCGACGGCGAGTGCCACACGCACAACTTCGCGCGCAAGTGCTTCTGCAAGAGGGCCTGCTAG
47	DEFL1-47	masprrmataapavlllvlllvatemgtlktaea RTCLSQSHKFKGACLSSSNCAAVCRTENFPDGECHTHNFARKCFCKRAC	AMP	8.077	defensin Tm-AMP-D1.2-like [Aegilops tauschii subsp. tauschii]	XP_020198482.1	85	ATGGCGTCCCCTCGTCGCATGGCCACGGCCGCGCCCGCCGTCCTCCTCCTCGTCCTGCTCCTCGTCGCCACAGAGATGGGGACTCTGAAGACAGCGGAGGCCCGGACGTGCCTGTCGCAGAGCCACAAGTTCAAGGGCGCCTGCCTCAGCAGCAGCAACTGCGCCGCCGTCTGCCGCACCGAGAACTTCCCCGACGGGGAGTGCCACACGCACAACTTCGCCCGCAAGTGCTTCTGCAAGAGGGCCTGCTAG
48	DEFL1-48	malsrrmaasallllvllvatemgattvklaea RDCLSQNHKFKGACLSSSNCAAVCRTENFPDGECNSHRLERKCFCKRTC	AMP	7.897	defensin Tm-AMP-D1.2-like [Aegilops tauschii subsp. tauschii]	XP_020198481.1	83	ATGGCGCTCTCTCGTCGCATGGCTGCGTCCGCCCTCCTGCTGCTGGTCCTCCTCGTCGCCACAGAGATGGGGGCGACGACGGTCAAGCTGGCTGAGGCGCGGGACTGCCTGTCCCAGAACCACAAGTTCAAGGGCGCCTGCCTCAGCAGCAGCAACTGCGCCGCCGTCTGCCGCACCGAGAACTTCCCCGACGGCGAGTGCAACTCCCACCGCCTCGAGCGCAAGTGCTTCTGCAAGCGGACCTGCTAA
49	DEFL1-49	masprrmataapavlllvlllvatemgtlktaea RTCLSQSHKFKGTCISDSNCAGVCRTENFPDGECHTHNFARKCFCKRAC	AMP	7.886	defensin Tk-AMP-D2-like [Aegilops tauschii subsp. tauschii]	XP_020172230.1	82	ATGGCGTCCCCTCGTCGCATGGCCACGGCCGCGCCCGCCGTCCTCCTCCTCGTCCTGCTCCTCGTCGCCACAGAGATGGGGACTCTGAAGACAGCGGAGGCCCGGACGTGCCTGTCGCAGAGCCACAAGTTCAAGGGCACCTGCATCAGCGACAGCAACTGCGCCGGCGTGTGCCGCACCGAGAACTTCCCCGACGGCGAGTGCCACACGCACAACTTCGCGCGCAAGTGCTTCTGCAAGAGGGCCTGCTAG
50	DEFL1-50	maltrrmaasallllfllvatetgattvkvaea RDCLSQSHKFKGACISSSNCAGVCRTENFPDGECHTHNFARKCFCKRAC	AMP	7.869	defensin [Triticum aestivum]	AIA66994.1	91	ATGGCGCTCACTCGTCGCATGGCCGCATCCGCCCTCCTGCTGCTGTTCCTCCTCGTCGCCACAGAGACGGGGGCGACGACGGTCAAGGTGGCGGAGGCGCGGGACTGTCTGTCGCAGAGCCACAAGTTCAAGGGCGCGTGCATCAGCAGCAGCAACTGCGCCGGCGTGTGCCGCACCGAGAACTTCCCCGACGGCGAGTGCCACACGCACAACTTCGCGCGCAAGTGCTTCTGCAAGAGGGCCTGCTAG
51	DEFL1-51	maltrrmaasallllfllvatemgattvea RDCLSQSHKFKGACLSSSNCAAVCRTENFPDGECHTHNFARKCFCKRAC	AMP	7.886	defensin [Triticum aestivum]	AIA66989.1	94	ATGGCGCTCACTCGTCGCATGGCCGCATCCGCCCTCCTGCTGCTGTTCCTCCTCGTCGCCACAGAGATGGGGGCGACGACGGTGGAGGCGCGGGACTGCCTGTCGCAGAGCCACAAGTTCAAGGGCGCCTGCCTCAGCAGCAGCAACTGCGCCGCCGTCTGCCGCACCGAGAACTTCCCCGACGGCGAGTGCCACACGCACAACTTCGCGCGCAAGTGCTTCTGCAAGAGGGCCTGCTAG
52	DEFL1-52	malsrrmaasallllvllvatetgattvkvaea RDCLSQSHKFKGACLSSSNCAAVCRTENFPDGECHTHNFARKCFCKRAC	AMP	7.886	defensin [Triticum aestivum]	AIA66989.1	98	ATGGCGCTCTCTCGTCGCATGGCTGCGTCCGCCCTCCTGCTGCTGGTCCTCCTCGTCGCCACAGAGACGGGGGCGACGACGGTCAAGGTGGCGGAGGCGCGGGACTGTCTGTCGCAGAGCCACAAGTTCAAGGGCGCCTGCCTCAGCAGCAGCAACTGCGCCGCCGTCTGCCGCACCGAGAACTTCCCCGACGGGGAGTGCCACACGCACAACTTCGCCCGCAAGTGCTTCTGCAAGAGGGCCTGCTAG
MOTIF: C[ABD-Z]{3,21}C[ABD-Z]{2,12}C[ABD-Z]{3,4}C[ABD-Z]{3,15}C[ABD-Z]{4,23}CCC
#	Name	Signaling sequence {32,35}| mature sequence {57}	AMP prediction	pI calculated	BLAST homology (if present, the first hit is indicated)	Accession	% identity	Nucleotide sequence
53	DEFL2-1	mamlkkntnalmccsfgaalmvvmattllssscda HKEMGDLAASFVPASCYSNYFPHCTDHRCKKFCGGAREPPVPGAFCNDRSNCCCPVS*	AMP	6.8	predicted protein [Hordeum vulgare subsp. vulgare]	BAJ96510.1	82	ATGGCGATGCTGAAGAAGAACACGAACGCCCTGATGTGCTGCAGCTTCGGGGCCGCCCTCATGGTGGTCATGGCTACCACCCTCCTCAGCTCCTCATGCGATGCCCACAAAGAGATGGGTGATCTTGCTGCTTCTTTTGTGCCGGCGTCGTGCTACTCCAACTACTTCCCACACTGCACCGACCACCGGTGCAAGAAGTTCTGCGGCGGCGCCCGCGAGCCGCCTGTGCCCGGAGCCTTCTGCAACGACAGAAGCAACTGCTGCTGCCCCGTTAGTTGA
54	DEFL2-2	mamlkkntnalmccsfgaalmvvmattllssscda HKEMGDLAASFVPASCYSNYFPHCTDHRCKKFCGGAREPPVPGAFCNDRSNCCCPIS*	AMP	6.8	predicted protein [Hordeum vulgare subsp. vulgare]	BAJ96510.1	80	ATGGCGATGCTGAAGAAGAACACGAACGCCCTGATGTGCTGCAGCTTCGGGGCCGCCCTCATGGTGGTCATGGCTACCACCCTCCTCAGCTCCTCATGCGATGCCCACAAAGAGATGGGTGATCTTGCTGCTTCTTTTGTGCCGGCGTCGTGCTACTCCAACTACTTCCCACACTGCACCGACCACCGGTGCAAGAAGTTCTGCGGCGGCGCCCGCGAGCCGCCTGTGCCCGGAGCCTTCTGCAACGACAGAAGCAACTGCTGCTGCCCTATTAGTTGA
55	DEFL2-3	mamkktstlccsfvaalvvvmaatlllsscda HKETDDLAASFVPASCYSNYFPHCTDHRCKKFCGGAREPPVPGAFCNDRSNCCCPVS*	AMP	6.37	hypothetical protein TRIUR3_01698 [Triticum urartu]	EMS59272.1	97	ATGGCGATGAAGAAGACGAGCACCCTGTGCTGCAGCTTCGTGGCCGCCCTCGTGGTGGTCATGGCTGCCACCCTCCTCCTCTCCTCATGCGATGCCCACAAAGAGACGGATGATCTTGCTGCTTCTTTTGTGCCGGCGTCGTGCTACTCCAACTACTTCCCACACTGCACCGACCACCGGTGCAAGAAGTTCTGCGGCGGCGCCCGCGAGCCGCCTGTGCCCGGAGCCTTCTGCAACGACAGAAGCAACTGCTGCTGCCCCGTTAGTTGA
56	DEFL2-4	mamkktstlccsfvaalvvvmaatlllsscda HKEMGDLAASFVPASCYSNYFPHCTDHRCKKFCGGVRAPPVPGAFCNDRSNCCCPVS*	AMP	7.1	hypothetical protein TRIUR3_01698 [Triticum urartu]	EMS59272.1	99	ATGGCGATGAAGAAGACGAGCACCCTGTGCTGCAGCTTCGTGGCCGCCCTCGTGGTGGTCATGGCTGCCACCCTCCTCCTCTCCTCATGCGATGCCCACAAAGAGATGGGTGATCTTGCTGCTTCTTTTGTGCCGGCGTCGTGCTACTCCAACTACTTCCCGCACTGCACCGATCACCGGTGCAAGAAGTTCTGCGGCGGCGTGCGGGCGCCGCCGGTGCCCGGAGCCTTCTGTAACGACAGAAGCAACTGCTGCTGCCCCGTTAGTTGA
	*DEFL(Fo)	mkisafflaatlasvm AASSHVQEPALEARAACWNRSSCGRAWSGKCEDYCKPYKFSHMATTDCGWLAKRCCCKT*			hypothetical protein FOMG_19266 [Fusarium oxysporum f. sp. melonis 26406]	EXK23984.1	100	ATGAAGATCAGCGCCTTCTTCCTCGCCGCTACCTTGGCTAGCGTGATGGCCGCCTCCTCCCATGTCCAGGAACCGGCCCTTGAAGCTCGGGCCGCGTGTTGGAATCGAAGCAGCTGCGGCAGAGCCTGGAGCGGCAAGTGCGAAGACTACTGCAAGCCCTACAAGTTCTCTCACATGGCCACGACCGACTGCGGCTGGTTGGCGAAGCGCTGCTGCTGCAAGACCTAA
MOTIF: C[ABD-Z]{2,14}C[ABD-Z]{3,5}C[ABD-Z]{3,16}C[ABD-Z]{4,28}C[ABD-Z]C
#	Name	Signaling sequence {15,35}| mature sequence {27,57}	AMP prediction	pI calculated	BLAST homology (if present, the first hit is indicated)	Accession	% identity	Nucleotide sequence
57	DEFL3-1	mvsmvmlsmvamlra TPSANVRCYSVSANYGVVFSCNKCAFPACRPSYKYECKEGNQCRCMPD*	AMP	7.41	hypothetical protein SOVF_136700 [Spinacia oleracea]	XP_021855527.1	64	ATGGTCTCCATGGTCATGCTATCCATGGTCGCCATGCTGCGCGCCACACCATCGGCAAATGTGCGATGTTATAGCGTTTCGGCCAACTATGGTGTCGTTTTCTCCTGCAACAAGTGTGCCTTCCCGGCCTGCCGCCCTTCCTACAAGTACGAATGCAAGGAAGGGAACCAGTGCAGGTGCATGCCAGACTAG
58	DEFL3-2	mlravavsvavcmragalc VPCVLCMRVVCVHVTNRCASVGSLCDC*	AMP	6.88				ATGCTGCGTGCGGTGGCGGTGAGCGTGGCCGTGTGCATGCGTGCTGGCGCGCTGTGTGTTCCCTGTGTGTTGTGTATGCGAGTGGTGTGCGTGCATGTAACGAATCGGTGTGCATCCGTAGGCAGCCTGTGCGATTGCTAG
59	DEFL3-3	mphssatrqvlfapgficllngicg NQEPYQVNCTQQGCVTACKKAGCGGGICHKDGSCNCL*	AMP	6.8				ATGCCACATTCCTCAGCCACCAGACAAGTTCTGTTTGCTCCTGGTTTTATATGTCTGCTAAACGGCATATGCGGCAATCAGGAACCCTACCAAGTCAATTGTACGCAACAAGGCTGTGTTACTGCCTGCAAAAAAGCGGGCTGCGGAGGTGGGATTTGCCATAAAGATGGTAGTTGCAACTGCCTCTAG
60	DEFL3-4	mkvivvllsdslciqlatp LKIIPEWSLRSGFCIVSCLQSACFGHISKKFVPLDCYHLKQTSVLSTFCFCQDEQLT*	Non-AMP	6.9				ATGAAGGTAATTGTTGTTCTTCTATCAGACTCGCTTTGCATACAACTAGCTACTCCGCTGAAAATTATTCCGGAGTGGTCGCTGAGAAGTGGATTTTGTATTGTGAGTTGTTTGCAATCAGCATGTTTTGGCCATATAAGCAAAAAATTCGTACCCTTGGACTGCTATCATCTGAAGCAGACTTCTGTACTGTCAACATTTTGTTTCTGCCAAGACGAACAACTGACTTGA
61	DEFL3-5	mscyftvvlncmislrpsmnslliilvctastsss SRVDQFTFIAVVCYHQLCSQILCSFRLLVPCVGEGCTCLS*	Non-AMP	6.18				ATGTCGTGCTATTTCACTGTAGTACTCAACTGTATGATTAGCTTAAGACCATCCATGAATTCATTGCTCATCATATTAGTTTGTACTGCATCTACTTCATCGAGTTCTCGGGTGGATCAGTTCACATTTATAGCTGTTGTTTGTTACCACCAATTATGTTCACAGATTTTGTGCAGTTTTAGACTTTTGGTCCCTTGTGTGGGTGAAGGTTGTACCTGTCTAAGTTAG
62	DEFL3-6	mlravavsvavglrllcmragalc VPCVLCMRVVCVHVTNRCASVGSLCDC*	AMP	6.88				ATGCTGCGTGCCGTGGCGGTGAGCGTGGCCGTGGGCTTGCGCCTGTTGTGCATGCGTGCTGGCGCGCTGTGTGTTCCCTGTGTGTTGTGTATGCGAGTGGTGTGCGTGCATGTAACGAATCGGTGTGCATCCGTAGGCAGCCTGTGTGATTGCTAG
63	DEFL3-7	mlllliicansllvry HQCSCKNRAGKAYSCISLCRSSHQIFCKPLVCQCPLFF*	AMP	7.88				ATGTTGCTTCTTTTAATCATCTGCGCTAATTCTCTCCTTGTTCGTTATCATCAGTGTTCTTGTAAAAACAGAGCTGGAAAAGCTTATTCGTGTATATCACTTTGTCGGTCTTCGCATCAAATATTTTGTAAGCCCTTAGTTTGCCAGTGTCCTTTGTTTTTTTGA
MOTIF: C[ABD-Z]{3,5}C[ABD-Z]{8,17}C[ABD-Z]{4,6}C
#	Name	Signaling sequence {10,28}| mature sequence {27,103}	AMP prediction	pI calculated	BLAST homology (if present, the first hit is indicated)	Accession	% identity	Nucleotide sequence
64	DEFL4-1	mhvrascmpvyllssvffflfegscs VSEEQLKASSTCSYLLCTVLPPSMNKCTSSFCLKSKF	Non-AMP	7.656				ATGCATGTACGAGCAAGCTGTATGCCAGTATATCTTTTGAGTTCTGTTTTCTTTTTTCTTTTTGAGGGTAGTTGCTCTGTTTCTGAAGAACAGTTGAAGGCTTCATCTACCTGCAGTTACTTGCTTTGTACTGTACTCCCTCCTTCCATGAATAAGTGTACTTCTAGCTTTTGTCTTAAGTCAAAGTTTTAA
65	DEFL4-2	mkpqtqlllllayiaaalvmsrgvla GAGTHAAMPVRTVEEDEVGFTEREEEAAYPQRRVLAYSPTSIGYGGLEANKAACYGSCPGRGQPYTGRGCKAIFGCRGR	AMP	7.375	uncharacterized protein LOC109732051 [Aegilops tauschii subsp. tauschii]	XP_020146828.1	98	ATGAAGCCGCAGACGCAGCTCCTCCTCCTCTTGGCCTACATCGCCGCGGCGCTGGTCATGAGCCGCGGCGTCCTCGCCGGCGCCGGCACCCATGCGGCGATGCCGGTGCGTACCGTCGAGGAAGACGAAGTGGGCTTCACGGAGCGTGAGGAGGAGGCGGCGTACCCACAGAGGAGGGTGCTTGCTTACAGCCCCACTTCCATCGGCTACGGAGGGCTGGAGGCGAACAAGGCGGCGTGCTACGGCTCCTGCCCCGGCCGGGGGCAGCCCTACACCGGCCGCGGCTGCAAGGCCATCTTCGGCTGCCGCGGGCGTTGA
66	DEFL4-3	mhgkplagvlaaallllasaspavga YSGKGGVSDAAAGARASAHVPTASTLTRRLEDEVEPELSWADNLLGGNGVSYDTLDRNGPACPRHDSCAGKKPGEAYTRPCNYREKCAPH	AMP	6.287				ATGCACGGGAAACCACTGGCCGGAGTGCTCGCCGCCGCCCTTCTGCTCTTGGCATCCGCCTCTCCGGCCGTCGGAGCGTACAGCGGCAAGGGCGGCGTCAGCGACGCCGCGGCGGGGGCGAGAGCTAGCGCTCATGTTCCCACGGCGTCGACATTGACGAGGCGGCTGGAGGATGAGGTGGAGCCGGAGCTGAGTTGGGCGGACAACCTCCTTGGGGGAAACGGCGTCAGCTACGACACCTTGGACCGGAACGGGCCAGCGTGCCCGCGGCATGACTCATGCGCGGGCAAAAAACCAGGAGAAGCATACACCCGCCCGTGCAACTACAGGGAAAAATGTGCGCCGCACTAA
67	DEFL4-4	merkshaallaavivllvaaavg EQSISYKSLDQAHQACPKHGTCAPRGFSYTRGAKCIFYNGECLG	AMP	7.608				ATGGAGAGGAAGAGCCATGCTGCCTTGTTGGCTGCCGTCATCGTCCTCCTCGTCGCAGCCGCGGTGGGCGAACAGTCGATCAGTTATAAGTCCCTAGACCAAGCCCACCAGGCGTGCCCGAAGCATGGCACCTGCGCTCCGCGTGGATTCTCCTACACCAGGGGCGCTAAATGTATATTTTACAACGGAGAATGTCTCGGCTAG
68	DEFL4-5	mdrkavcigfvilalvllagpgaka AALVGGTGTASFNPLRQLMPLSLLSSMRLEDGVAPELAVVSTVVDLGVHRRVLAGIDTGPLNGNKQACKPKCAQPGQPITGRNCLKIYRCPGGN	AMP	9.223	uncharacterized protein LOC109783562 [Aegilops tauschii subsp. tauschii]	XP_020197748.1	83	ATGGACAGAAAGGCGGTGTGCATCGGGTTTGTGATCCTCGCGCTTGTGCTGCTCGCTGGACCGGGCGCGAAGGCCGCGGCGCTCGTCGGCGGCACTGGCACTGCCAGCTTCAACCCGCTGCGGCAGCTGATGCCGTTGTCGTTGTTGTCGTCGATGAGGCTGGAGGACGGCGTGGCCCCGGAGCTCGCGGTCGTGTCTACCGTGGTGGACCTCGGGGTGCACCGGCGCGTCCTCGCCGGCATCGACACGGGGCCACTGAACGGCAACAAGCAAGCCTGCAAGCCGAAGTGCGCGCAGCCCGGACAGCCGATCACCGGCCGGAACTGCCTCAAGATTTACCGCTGCCCAGGAGGAAACTGA
69	DEFL4-6	mhslsvldtllpssfvlvna MCMGACSTNSTSNKYDPFCRRANSCLLLSPLSVSEPSQTHM	AMP	7.182				ATGCATTCCTTGTCTGTTTTAGATACTTTGCTCCCAAGCAGCTTTGTTTTGGTTAATGCAATGTGTATGGGCGCTTGCAGTACAAATAGTACCAGTAATAAATATGATCCGTTTTGTAGAAGAGCGAATTCTTGTTTGCTTCTGAGTCCCTTGTCTGTGTCTGAACCGAGTCAAACCCACATGTAA
70	DEFL4-7	mqislkcticmlfnclhallpawa EPYCLVFGCLHVSPQTQGMVFGCMQGLMCGNLFG	Non-AMP	4.84				ATGCAAATCAGCCTCAAATGCACCATATGCATGTTGTTTAATTGCCTGCATGCTCTCTTACCTGCATGGGCTGAACCATACTGCCTGGTGTTTGGTTGCCTGCATGTTAGTCCACAAACCCAGGGCATGGTGTTTGGTTGTATGCAAGGCCTGATGTGTGGTAACCTCTTTGGCTAG
71	DEFL4-8	mklqtqllllasitaalimscgvla GTTHAIPVPTLRGIEDDDVGFAEREEAAYPRRRVLYGDQYISYKGVQASRPACSGSCAGRGQPYTGSGCQAIFGCHGR	AMP	7.384	uncharacterized protein LOC109769576 [Aegilops tauschii subsp. tauschii]	XP_020183894.1	88	ATGAAGCTGCAAACCCAACTACTCCTCTTGGCTTCCATCACCGCAGCGCTGATCATGAGCTGCGGCGTCCTCGCCGGCACTACCCACGCGATACCGGTGCCCACGCTACGCGGCATCGAGGACGACGACGTGGGCTTCGCGGAGCGCGAGGAGGCGGCGTACCCGCGGAGGAGGGTGCTTTACGGCGACCAGTACATCAGCTACAAAGGGGTGCAGGCGAGCAGGCCGGCGTGCTCCGGCTCCTGCGCTGGCCGGGGGCAGCCCTACACCGGTAGCGGCTGCCAGGCCATCTTCGGCTGCCACGGGCGTTAA
72	DEFL4-9	mklqtqllllasitaalimscgvla GTTHAIPVPTLRGIEDDDVGFAEREEAAYPRRRVLYGDQYISYKGVQASRPACSGSCAGRGQPYTGSGCQAIFGCRGR	AMP	7.778	uncharacterized protein LOC109769576 [Aegilops tauschii subsp. tauschii]	XP_020183894.1	89	ATGAAGCTGCAAACCCAACTACTCCTCTTGGCTTCCATCACCGCAGCGCTGATCATGAGCTGCGGCGTCCTCGCCGGCACTACCCACGCGATACCGGTGCCCACGCTACGCGGCATCGAGGACGACGACGTGGGCTTCGCGGAGCGCGAGGAGGCGGCGTACCCGCGGAGGAGGGTGCTTTACGGCGACCAGTACATCAGCTACAAAGGGGTGCAGGCGAGCAGGCCGGCGTGCTCCGGCTCCTGCGCTGGCCGGGGGCAGCCCTACACCGGTAGCGGCTGCCAGGCCATCTTCGGCTGCCGCGGCCGTTAA
73	DEFL4-10	mgrkvcislailalllvagpgaka APFAGGPASMDAAVAVRRQMSAMKLEDGVAPELTVDLEVHRRILAINVGQSALDGNRPSCIQNCPARGDSYTGRGCLKRYGCNGGS	Non-AMP	7.814	hypothetical protein TRIUR3_10671 [Triticum urartu]	EMS56614.1	95	ATGGGCAGAAAGGTGTGCATCTCTCTTGCCATCCTCGCGCTTCTTCTGGTCGCTGGTCCGGGCGCGAAGGCTGCACCCTTCGCCGGCGGCCCCGCCAGCATGGACGCGGCGGTGGCGGTGCGGCGGCAGATGTCAGCGATGAAGCTGGAGGACGGCGTGGCGCCGGAGCTCACGGTGGACCTGGAGGTCCACCGCCGCATCCTCGCCATCAACGTCGGCCAGAGCGCCCTGGACGGCAACAGGCCAAGCTGCATCCAAAACTGCCCGGCGCGCGGAGACTCGTACACCGGCCGGGGTTGCCTCAAAAGGTACGGATGCAATGGAGGAAGCTGA
74	DEFL4-11	mgnngvwcvllvglllvasveg DDRSVHLNLKPSAGEAGGVTVAKVGLPAVRFSICDVWCEDVHPNMNHRLCVQNLCPYDKTPRVKLTSDDLLSA	Non-AMP	6.238	hypothetical protein TRIUR3_18760 [Triticum urartu]	EMS55877.1	66	ATGGGTAACAATGGTGTGTGGTGTGTCCTGTTAGTGGGGCTTCTCCTGGTTGCATCAGTGGAGGGAGATGACCGGAGTGTGCATCTTAATCTCAAGCCTTCTGCTGGAGAAGCGGGAGGAGTTACGGTAGCCAAGGTAGGTCTACCTGCTGTCCGGTTCTCCATCTGCGACGTCTGGTGCGAGGACGTACACCCAAACATGAACCACAGACTCTGCGTCCAGAATCTGTGCCCCTATGACAAGACCCCAAGGGTAAAGCTCACCTCCGACGACCTACTGTCTGCGTGA
75	DEFL4-12	mdrnvcislvmlalvla GPDTGAAAAAVYNVDQAVMPTPSSLRRLEDGVPPELAVVTTLDVHNRVYGASGIANGALDAVKPRCVRNCPAPSGAPYTGRGCNKYYDCRV	AMP	7.329	hypothetical protein TRIUR3_04929 [Triticum urartu]	EMS66731.1	99	ATGGACAGAAACGTCTGCATCTCCCTTGTGATGCTTGCGCTTGTGCTCGCTGGCCCGGACACGGGGGCCGCGGCGGCGGCGGTCTACAACGTCGACCAGGCGGTGATGCCAACGCCGTCGTCGTTGAGGAGGCTGGAGGATGGCGTGCCGCCGGAGCTCGCGGTGGTGACGACGTTGGACGTGCACAACCGCGTCTACGGCGCCAGCGGCATCGCCAACGGAGCCCTGGACGCCGTCAAGCCACGCTGCGTCCGCAACTGCCCGGCGCCGTCCGGTGCTCCGTACACGGGCCGGGGATGCAACAAATACTACGATTGCCGTGTTTGA
76	DEFL4-13	mdrnvcislvmlalvla GPDTGAAAAAVYNVDQAVMPTPSSLRRLEDGVPPELAVVTTMDLDVRSRVYGAGDISNGALDANKPRCVRNCPAPAGYPYTGRGCNKYYDCRD	Non-AMP	4.95	hypothetical protein TRIUR3_04929 [Triticum urartu]	EMS66731.1	90	ATGGACAGAAACGTCTGCATCTCCCTTGTGATGCTTGCGCTTGTGCTCGCTGGCCCGGACACGGGGGCCGCGGCGGCGGCGGTCTACAACGTCGACCAGGCGGTGATGCCAACGCCGTCGTCGTTGAGGAGGCTGGAGGATGGCGTGCCGCCGGAGCTCGCGGTGGTGACGACGATGGACCTGGACGTGCGCAGCCGCGTCTACGGCGCCGGCGACATCTCCAACGGAGCCCTGGACGCCAACAAGCCACGCTGTGTCCGTAACTGCCCGGCGCCGGCCGGTTATCCGTACACGGGCCGGGGATGCAACAAATACTACGATTGCCGTGATTGA
77	DEFL4-14	mgasklfraflagvlllllvvaaqlaga QHISYFPNRPACPNQCGAPGQSYTRGCTYKDRCPH	AMP	7.956	predicted protein [Hordeum vulgare subsp. vulgare]	BAJ85857.1	56	ATGGGGGCGAGCAAGCTATTCCGGGCGTTCCTGGCCGGCGTCCTCCTCCTCCTGCTCGTCGTCGCCGCGCAGCTCGCCGGCGCCCAGCACATCAGCTACTTCCCGAATAGGCCGGCGTGCCCGAACCAGTGCGGGGCGCCGGGGCAGTCCTACACCAGGGGCTGCACGTACAAGGACCGGTGCCCGCACTGA
78	DEFL4-15	mdrkvcisvvilalavlagpgaka AALAGGAASIDAGAAVRQLMSVSLPSSMKLQDGVASELAVASVVNLARHRRLLSLGFPPAVLDNRAACNPTCPGQGQPYTDHGCNSRYLCRH	Non-AMP	8.194	hypothetical protein TRIUR3_04932 [Triticum urartu]	EMS66733.1	99	ATGGATAGGAAGGTGTGCATCTCTGTCGTAATCCTCGCGCTAGCTGTGCTCGCTGGCCCGGGCGCGAAGGCGGCCGCGCTCGCCGGTGGCGCTGCCAGCATCGACGCGGGGGCGGCGGTGCGACAGCTGATGTCAGTGTCGCTGCCGTCGTCCATGAAGCTGCAAGACGGCGTGGCGTCGGAGCTAGCGGTGGCATCGGTGGTGAACCTGGCGAGGCACCGCCGCCTCCTCTCATTAGGCTTCCCCCCGGCCGTCCTGGACAACAGGGCAGCTTGCAACCCAACTTGTCCGGGGCAAGGACAGCCGTACACCGACCATGGATGCAATAGCAGGTACCTCTGCCGGCACTGA
79	DEFL4-16	mdrkvciflvilvlavla GPGAKAAALDSGTGSIDAGAAVRQLMSASHSSSMKLDDGVVPELAVASVVDLEVHRRILAGAPVSPGALNPNKGVCTKRGGCGGKGNPYSGRGCNRYNFCPPK	AMP	8.966	unnamed protein product [Triticum aestivum]	CDM86532.1	96	ATGGACAGAAAGGTGTGCATCTTCCTAGTAATCCTCGTGCTAGCTGTGCTCGCTGGCCCGGGCGCGAAGGCGGCGGCGCTCGACAGTGGCACTGGCAGCATCGACGCGGGTGCGGCGGTGCGACAACTGATGTCGGCGTCGCATTCGTCGTCCATGAAGCTGGACGACGGAGTGGTGCCGGAGCTCGCGGTGGCGTCGGTGGTGGACCTGGAGGTGCACCGCCGCATCCTCGCCGGCGCACCGGTCAGCCCGGGAGCCCTGAATCCCAACAAGGGAGTCTGCACCAAGCGTGGTGGGTGCGGGGGGAAGGGAAATCCGTACTCTGGCCGGGGATGCAACCGATATAACTTCTGCCCGCCAAAGTGA
80	DEFL4-17	mivmcslllcltknss KYSCSNVEACKPVTYLHSFALNSVHGCGNMTCQI	AMP	7.158				ATGATTGTGATGTGCTCTCTATTGTTATGTCTGACGAAGAATAGTTCCAAATATTCCTGTTCAAATGTTGAGGCCTGTAAGCCTGTTACATATTTGCATTCGTTTGCACTGAATTCGGTGCATGGATGTGGAAATATGACGTGTCAAATTTGA
81	DEFL4-18	mdtkacislvilalvla GPDTRAAALTGIDAAAAVMPTSSSSRIKLGDGVAPELLDSTTVDLKGHRRVLAGRGISASSLNPNKAACTRTCPAHGGPYTGRPCLRRYQCR	AMP	10.109	uncharacterized protein LOC109776335 [Aegilops tauschii subsp. tauschii]	XP_020190562.1	96	ATGGACACAAAGGCGTGCATCTCGCTTGTAATCCTCGCGCTCGTGCTTGCCGGCCCGGACACGAGGGCTGCGGCGCTCACCGGCATCGACGCTGCGGCGGCTGTAATGCCAACGTCGTCGTCTTCCCGCATAAAGCTTGGGGATGGCGTGGCGCCTGAGCTCCTGGATTCGACGACGGTGGACCTGAAGGGGCACCGCCGCGTCCTCGCCGGCAGAGGCATCAGCGCGAGTTCCCTGAACCCCAACAAGGCAGCCTGCACCAGGACGTGCCCGGCACACGGAGGGCCCTACACCGGCCGGCCATGCCTCCGAAGGTACCAGTGCCGTTAG
82	DEFL4-19	mdtkacislvilalvla GPDTRAAALTGIDAAAAVMPTSSSSRIKLGDGVAPELLDSTTVDLKGHRRVLAGGGISAGSLNSNKAACTRTCPAHGGPYTGRPCLRRYQCR	AMP	9.633	uncharacterized protein LOC109776335 [Aegilops tauschii subsp. tauschii]	XP_020190562.1	99	ATGGACACAAAGGCGTGCATCTCGCTTGTAATCCTCGCGCTCGTGCTTGCCGGCCCGGACACGAGGGCTGCGGCGCTCACCGGCATCGACGCTGCGGCGGCTGTAATGCCAACGTCGTCGTCTTCCCGCATAAAGCTTGGGGATGGCGTGGCGCCTGAGCTCCTGGATTCGACGACGGTGGACCTGAAGGGGCACCGCCGCGTCCTCGCCGGCGGAGGCATCAGCGCGGGTTCCCTGAACTCCAACAAGGCAGCCTGCACCAGGACGTGCCCGGCACACGGAGGGCCCTACACCGGCCGGCCATGCCTCCGAAGGTACCAGTGCCGTTAG
83	DEFL4-20	mgrclsfllllgvalalagpang DISAGFAASGAAYSIDAAVRQLMSPSSMKLEDGVDPEFSVDLEVHRRVLAGISPGALSRNRPACPGACPAPGGSYTNRGCQKKYQCRG	AMP	7.783	uncharacterized protein LOC109783290 [Aegilops tauschii subsp. tauschii]	XP_020197492.1	100	ATGGGCAGATGCCTCTCTTTTCTACTCCTCCTGGGCGTCGCGCTTGCGCTCGCCGGCCCGGCTAACGGCGACATATCGGCGGGGTTCGCCGCTTCAGGGGCAGCATACAGCATCGACGCCGCGGTGCGGCAGCTGATGTCGCCATCATCGATGAAGCTGGAGGACGGCGTGGACCCTGAGTTCAGTGTCGACCTGGAGGTGCACCGCCGCGTCCTCGCCGGCATCAGCCCCGGTGCCCTGAGCCGCAACAGGCCCGCCTGCCCCGGCGCGTGCCCGGCGCCCGGAGGATCGTACACCAACCGGGGATGCCAGAAGAAGTACCAGTGCCGTGGCTGA
84	DEFL4-21	mddpwtasat KCHLLCLVLKQLSPPVIIYTRKCYPIQCVK	AMP	8.881				ATGGATGATCCATGGACTGCTTCAGCCACGAAGTGTCATCTGTTATGTCTAGTGCTAAAACAACTTTCTCCTCCTGTAATCATATATACGCGTAAATGTTACCCAATCCAATGTGTAAAATAG
85	DEFL4-22	mavsklgpaaaflarillllvvvaqvaa GGPNIGLIPGSPACPHTCTNPQQSYTRSCLYADHCSPR	AMP	7.215	hypothetical protein F775_09490 [Aegilops tauschii]	EMT07570.1	97	ATGGCGGTGAGCAAGCTTGGCCCGGCGGCGGCGTTCCTGGCTCGCATCCTCCTCCTGCTCGTCGTCGTCGCCCAGGTTGCCGCCGGCGGCCCGAACATCGGCCTCATCCCGGGAAGCCCGGCGTGCCCTCACACGTGCACGAACCCGCAGCAGTCCTACACCAGGAGCTGCCTATACGCCGACCATTGCTCCCCGCGGTGA
86	DEFL4-23	mffqnlmrhlh PWLLHVLKCAVDSCVLKLPQWGCLIITFCRVMPRHF	AMP	8.198				ATGTTTTTTCAGAATCTTATGAGGCATTTGCACCCATGGCTGCTTCATGTGCTGAAATGCGCAGTGGATTCGTGCGTCCTCAAGTTGCCACAGTGGGGATGCTTGATTATTACGTTTTGTCGAGTCATGCCAAGGCATTTCTGA
87	DEFL4-24	micwtwspttrmlssmtwliista RTGTPTCMMMCSMSEGAVARTGFSCGRMGTWC	AMP	7.732				ATGATCTGCTGGACGTGGTCACCGACGACGAGGATGCTGAGTTCGATGACATGGCTGATTATATCGACGGCGCGGACTGGGACGCCGACATGTATGATGATGTGTTCGATGTCTGAAGGAGCTGTGGCCAGGACCGGGTTCTCATGTGGAAGGATGGGAACTTGGTGCTGA
88	DEFL4-25	msmfmwlssaetwidvvlc VPFCDELCTRGFSFPLLPPVCSPLVCRGYVFIMSKTVS	AMP	7.147				ATGAGCATGTTCATGTGGCTTTCATCTGCTGAAACATGGATTGACGTTGTGCTTTGTGTCCCTTTCTGTGATGAGCTGTGCACGAGAGGTTTCAGTTTTCCCTTGCTCCCCCCGGTTTGCTCCCCCCTGGTTTGCCGTGGTTATGTATTTATTATGTCAAAAACTGTGAGTTGA
89	DEFL4-26	mgefrcwifyllfctvlrcrgstg RRFCLGYCHSYSRTIRSSAVCSIFRTC	AMP	9.117				ATGGGAGAATTTAGATGTTGGATCTTCTATCTTCTCTTTTGCACCGTCCTCAGGTGTAGAGGATCCACAGGTCGAAGGTTCTGCCTTGGCTACTGCCATAGTTATTCACGAACCATCCGCTCCTCAGCAGTCTGTTCAATTTTCCGAACATGTTAA
90	DEFL4-27	mdrnvcvslvilalvlacadtea AAVYNVDQAVMPKSSSSSMRLEDVVAPELAVVTTMDLDVRSRVYGAGDISNGALDANKPRCVRNCPAPAGYPYTGRGCNKYYDCRD	Non-AMP	6.102	hypothetical protein TRIUR3_34857 [Triticum urartu]	EMS46282.1	97	ATGGACAGAAATGTGTGCGTCTCTCTTGTGATCCTTGCCCTTGTGCTCGCTTGCGCAGACACCGAGGCGGCGGCGGTCTACAACGTCGACCAGGCGGTGATGCCAAAGTCGTCGTCGTCGTCGATGAGGCTGGAGGATGTAGTGGCGCCGGAGCTCGCGGTGGTGACGACGATGGACCTGGACGTGCGCAGCCGCGTCTACGGCGCCGGCGACATCTCCAACGGAGCCCTGGACGCCAACAAGCCACGCTGTGTCCGTAACTGCCCGGCGCCGGCCGGTTATCCGTACACGGGCCGGGGATGCAACAAATACTACGATTGCCGTGATTGA
91	DEFL4-28	mklqtqllllasitarltmsrgvla GGTHAMPMPALRGVDDDDVGFAEREEAAYPRRRVLYGDQYISYIGVHASRPACSGSCAGRGQPYTGSGCQAIFGCHGR	AMP	6.778	uncharacterized protein LOC109769576 [Aegilops tauschii subsp. tauschii]	XP_020183894.1	81	ATGAAGCTGCAAACGCAACTACTCCTCCTGGCTTCCATCACCGCACGGCTGACCATGAGCCGCGGCGTCCTCGCCGGCGGCACCCATGCGATGCCCATGCCCGCGCTACGCGGCGTCGACGACGATGACGTGGGCTTCGCAGAGCGTGAGGAGGCGGCGTACCCGCGGAGGAGGGTGCTTTACGGCGACCAGTACATCAGCTACATAGGGGTGCACGCGAGCAGGCCGGCGTGCTCCGGCTCCTGCGCTGGCCGGGGGCAGCCCTACACCGGTAGCGGCTGCCAGGCCATCTTCGGCTGCCACGGGCGTTAA
92	DEFL4-29	mmilitkmllemycll DSLYDHCGHSCLVMLKLWVDPCKIVKCGVQILSLILSRIVLQ	Non-AMP	7.278				ATGATGATATTGATTACTAAGATGCTTTTAGAAATGTACTGTTTGCTTGATAGTTTATATGATCATTGCGGTCATTCATGCCTCGTAATGTTGAAACTGTGGGTAGATCCATGTAAAATTGTCAAATGTGGAGTGCAAATCCTCAGTCTGATTCTGTCAAGAATTGTGCTCCAGTGA
93	DEFL4-30	micwmwspttrmlssmtwliista RTGTPTCMMMCSMSEGAVARTGFSCGRMGTWC	AMP	7.732				ATGATCTGCTGGATGTGGTCACCGACGACGAGGATGCTGAGTTCGATGACATGGCTGATTATATCGACGGCGCGGACTGGGACGCCGACATGTATGATGATGTGTTCGATGTCTGAAGGAGCTGTGGCCAGGACCGGGTTCTCATGTGGAAGGATGGGAACTTGGTGCTGA
94	DEFL4-31	mhslsvleslfpssfvlvna MCMGACSTNSTSNKYDPFCRRANSCLLLSPLSVSEPSQTHM	AMP	7.182				ATGCATTCTTTGTCTGTTTTAGAGAGCTTGTTCCCAAGCAGCTTTGTTTTGGTTAATGCAATGTGTATGGGCGCTTGCAGTACAAATAGTACCAGTAATAAATATGATCCATTTTGTAGAAGAGCGAATTCTTGTTTGCTTCTGAGTCCCTTGTCTGTGTCTGAACCGAGTCAAACCCACATGTAA
95	DEFL4-32	mklqtqllllasitarltmsrgvla GGTHAMPMPALRGVDDDDVGFAEREEAAYPRRRVLYGDQYISYIGVHASRPACSGSCAGRGQPYTGSGCQAIFGCRGR	AMP	7.385	uncharacterized protein LOC109769576 [Aegilops tauschii subsp. tauschii]	XP_020183894.1	82	ATGAAGCTGCAAACGCAACTACTCCTCCTGGCTTCCATCACCGCACGGCTGACCATGAGCCGCGGCGTCCTCGCCGGCGGCACCCATGCGATGCCCATGCCCGCGCTACGCGGCGTCGACGACGATGACGTGGGCTTCGCAGAGCGTGAGGAGGCGGCGTACCCGCGGAGGAGGGTGCTTTACGGCGACCAGTACATCAGCTACATAGGGGTGCACGCGAGCAGGCCGGCGTGCTCCGGCTCCTGCGCTGGCCGGGGGCAGCCCTACACCGGTAGCGGCTGCCAGGCCATCTTCGGCTGCCGCGGCCGTTAA
96	DEFL4-33	mkpqtqlllllayiaaalvmsggvla GAGTSAMPVRTIEDDEVGFAEGEEEAAYPQRRVLAYSPTSIGYGGLEANKAACYGSCPGRGQPYTGRGCKAIFGCRGR	AMP	6.182	uncharacterized protein LOC109732051 [Aegilops tauschii subsp. tauschii]	XP_020146828.1	91	ATGAAGCCGCAGACGCAGCTCCTCCTCCTCCTGGCCTACATCGCCGCGGCGCTGGTCATGAGCGGCGGCGTCCTCGCCGGCGCCGGCACCAGCGCGATGCCGGTGCGCACCATCGAGGACGACGAAGTGGGCTTCGCAGAGGGTGAGGAGGAGGCGGCATACCCACAGAGGAGGGTGCTTGCTTACAGCCCCACTTCCATCGGCTACGGAGGGCTGGAGGCGAACAAGGCGGCGTGCTACGGCTCCTGCCCCGGCCGGGGGCAGCCCTACACCGGCCGCGGCTGCAAGGCCATCTTCGGCTGCCGCGGGCGTTGA
97	DEFL4-34	mgrclsflfllgvalklagpang DMSAAFAGTGAAYSIDGAVRQLMSPSSMKLEDGVDPELSVDLEVHRRVLAGISPGALSRNRPACPGACPAPGGSYTNRGCQKKYQCRG	AMP	7.783	uncharacterized protein LOC109783290 [Aegilops tauschii subsp. tauschii]	XP_020197492.1	93	ATGGGCAGATGCCTCTCTTTTCTATTCCTCCTGGGCGTCGCGCTTAAGCTCGCCGGCCCGGCCAACGGCGACATGTCGGCGGCGTTCGCCGGTACAGGGGCGGCGTACAGCATCGACGGCGCGGTGCGGCAGCTGATGTCGCCGTCGTCGATGAAGCTGGAGGACGGCGTGGACCCTGAGCTCAGTGTCGACCTGGAGGTGCACCGCCGCGTCCTCGCCGGCATCAGCCCCGGTGCCCTGAGCCGCAACAGGCCCGCCTGCCCCGGCGCGTGCCCGGCGCCCGGAGGATCGTACACCAACCGGGGATGCCAGAAGAAGTACCAGTGCCGTGGCTGA
98	DEFL4-35	mgrclsfllllgvalalagpang DISAGFAASGAAYSIDAAVRQLMSPSSMKLEDGVDPELSVDLEVHRRVLAGISPGALSRNRPACPGACPAPGGSYTNRGCQKKYQCRG	AMP	7.783	uncharacterized protein LOC109783290 [Aegilops tauschii subsp. tauschii]	XP_020197492.1	99	ATGGGCAGATGCCTCTCTTTTCTACTCCTCCTGGGCGTCGCGCTTGCGCTCGCCGGCCCGGCTAACGGCGACATATCGGCGGGGTTCGCCGCTTCAGGGGCAGCATACAGCATCGACGCCGCGGTGCGGCAGCTGATGTCGCCATCATCGATGAAGCTGGAGGACGGCGTGGACCCTGAGCTCAGTGTCGACCTGGAGGTGCACCGCCGCGTCCTCGCCGGCATCAGCCCCGGTGCCCTGAGCCGCAACAGGCCCGCCTGCCCCGGCGCGTGCCCGGCGCCCGGAGGATCGTACACCAACCGGGGATGCCAGAAGAAGTACCAGTGCCGTGGCTGA
99	DEFL4-36	mcylhllinfvqcptctvla SQSSCQVKCSLIAWLSFLIDVCTVLLCTRVKKRLLPLEAKY	Non-AMP	8.572				ATGTGTTATCTTCATCTGCTCATCAACTTTGTTCAGTGTCCTACCTGTACTGTTCTTGCGTCACAATCTAGTTGTCAAGTGAAATGCAGTCTAATAGCATGGCTTTCTTTCTTGATTGACGTCTGTACTGTACTGTTGTGCACTAGGGTTAAGAAGAGGCTCTTGCCCCTGGAGGCAAAATATTAG
100	DEFL4-37	mdtkacislvilalllagpdtra AALARIDAAAAVMPTSSATWMKLEDGVAPELLGSTAVDLEGHRRVLASTSITASSLNPNKAACTRTCPARGRPYTGRACLRRYQCRQGQ	Non-AMP	9.693	hypothetical protein TRIUR3_04927 [Triticum urartu]	EMS66729.1	97	ATGGACACAAAGGCGTGCATCTCGCTTGTAATCCTCGCGCTCCTGCTCGCCGGCCCGGACACGAGAGCTGCGGCGCTCGCCCGCATCGACGCGGCGGCGGCAGTGATGCCAACGTCGTCGGCGACGTGGATGAAGCTTGAGGACGGCGTGGCGCCGGAGCTCTTGGGTTCGACGGCGGTGGACCTGGAGGGGCACCGCCGCGTCCTTGCCAGCACAAGCATCACTGCGAGTTCCCTGAACCCCAACAAGGCAGCCTGCACCAGGACGTGCCCGGCGCGAGGACGGCCGTACACCGGCCGGGCATGCCTCAGAAGGTACCAGTGCCGTCAGGGACAGTGA
101	DEFL4-38	mdtkacislvilalvla GPDTRAAAFTGIDAAAAVMPTSSSSRIKLGDGVAPELLDSTTVDLKGHRRVLAGGGISAGSLNSNKAACTRTCPAHGGPYTGRPCLRRYQCR	AMP	9.633	uncharacterized protein LOC109776335 [Aegilops tauschii subsp. tauschii]	XP_020190562.1	98	ATGGACACAAAGGCGTGCATCTCGCTTGTAATCCTCGCGCTCGTGCTTGCCGGCCCGGACACGAGGGCTGCGGCCTTCACCGGCATCGACGCTGCGGCGGCTGTAATGCCAACGTCGTCGTCTTCCCGCATAAAGCTTGGGGATGGCGTGGCGCCTGAGCTCCTGGATTCGACGACGGTGGACCTGAAGGGGCACCGCCGCGTCCTCGCCGGCGGAGGCATCAGCGCGGGTTCCCTGAACTCCAACAAGGCAGCCTGCACCAGGACGTGCCCGGCACACGGAGGGCCCTACACCGGCCGGCCATGCCTCCGAAGGTACCAGTGCCGTTAG
102	DEFL4-39	mqfkwyalthflsfval DNCGSLCDSLESSLGQPFKCLYVLHICL	Non-AMP	4.083				ATGCAGTTTAAGTGGTATGCATTGACACATTTTCTTAGTTTCGTAGCGCTCGACAATTGTGGAAGCCTGTGTGATTCTCTCGAATCTAGCTTAGGCCAACCGTTTAAGTGTTTGTATGTTCTTCACATTTGCTTATAA
103	DEFL4-40	mqfkwyalthflsfaal ENCGSLCDSLESSLGQPFKCLYVLHICL	Non-AMP	4.201				ATGCAGTTTAAGTGGTATGCATTGACACATTTTCTTAGTTTTGCAGCGCTCGAAAATTGTGGAAGCCTGTGTGATTCTCTCGAATCTAGCTTAGGCCAACCGTTTAAGTGTTTGTATGTTCTTCACATTTGCTTATAA
104	DEFL4-41	mkpqtqlllllayiaaalvmsggvla GAGTHAAMPVRTVEEDEVGFTEREEEAAYPQRRVLAYSPTSIGYGGLEANKAACYGSCPGRGQPYTGRGCKAIFGCRGR	AMP	7.375	uncharacterized protein LOC109732051 [Aegilops tauschii subsp. tauschii]	XP_020146828.1	99	ATGAAGCCGCAGACGCAGCTCCTCCTCCTCTTGGCCTACATCGCCGCGGCGCTGGTCATGAGCGGCGGCGTCCTCGCCGGCGCCGGCACCCATGCGGCGATGCCGGTGCGTACCGTCGAGGAAGACGAAGTGGGCTTCACGGAGCGTGAGGAGGAGGCGGCGTACCCACAGAGGAGGGTGCTTGCTTACAGCCCCACTTCCATCGGCTACGGAGGGCTGGAGGCGAACAAGGCGGCGTGCTACGGCTCCTGCCCCGGCCGGGGGCAGCCCTACACCGGCCGCGGCTGCAAGGCCATCTTCGGCTGCCGCGGGCGTTGA
105	DEFL4-42	mkskvcislvilalavlpglg MKAAALAGGTATTEDAAASQMMAISPSSMKLEDGVPPELAVVDLEVHRRVLTGTNISPNNGLNPYRPVCNPACTPGKSYNFQGRPCANIYMCVGHR	Non-AMP	7.409	unnamed protein product [Triticum aestivum]	CDM86531.1	100	ATGAAAAGCAAGGTCTGCATCTCTCTTGTAATCCTCGCGCTAGCTGTGCTCCCTGGCCTGGGCATGAAGGCGGCCGCGCTCGCCGGCGGAACGGCTACCACCGAGGACGCGGCGGCGTCGCAGATGATGGCGATATCGCCATCATCGATGAAGCTAGAAGACGGCGTGCCGCCAGAGCTTGCGGTGGTGGACTTGGAGGTGCACCGCCGCGTCCTCACGGGCACAAACATCAGCCCGAATAACGGCCTGAATCCCTACAGGCCAGTCTGCAACCCCGCGTGCACACCCGGAAAGTCGTACAATTTCCAAGGCCGGCCGTGCGCCAATATTTACATGTGCGTCGGTCACAGATAA
MOTIF: C[ABD-Z]{0,42}C[ABD-Z]{3,5}C[ABD-Z]{9,17}C[ABD-Z]{4,6}C
#	Name	Signaling sequence {15,23}| mature sequence {32,86}	AMP prediction	pI calculated	BLAST homology (if present, the first hit is indicated)	Accession	% identity	Nucleotide sequence
106	DEFL5-1	mpamllrvpsillalilrsvarc QSTRGTGCRPAAAPTSLPWGHSSPTKAPPQMCRLICQGKVRLRPSMECPTAPCSFRIQVQHK	AMP	10.675				ATGCCAGCAATGCTGCTGCGGGTGCCATCGATCTTGCTCGCGCTTATACTCCGCTCAGTTGCGCGCTGCCAAAGTACCCGAGGCACGGGCTGTCGGCCGGCAGCGGCCCCGACCAGTCTTCCTTGGGGGCATTCTTCTCCAACAAAAGCTCCTCCTCAAATGTGCAGGTTAATTTGCCAGGGGAAGGTTCGACTTCGACCATCGATGGAATGCCCCACGGCGCCGTGCAGTTTCAGGATTCAAGTGCAGCACAAATGA
107	DEFL5-2	mflllvvdaflplmvvvvg VGWHAAHHVHPLGLERSIRTAPHEQRRGDNLVLDRRNVGACLEPCREGGCGGITAGRDVLEHLLCHVLRCEQVQEVLPVAGVVVA	Non-AMP	6.652				ATGTTCTTGCTGCTGGTGGTTGATGCCTTCCTTCCTCTGATGGTGGTGGTCGTCGGCGTAGGATGGCATGCCGCTCATCATGTTCATCCCCTGGGCCTCGAGCGCAGCATTAGAACCGCTCCCCATGAACAACGGCGAGGCGACAACCTCGTACTTGATCGGAGAAACGTCGGAGCCTGCCTCGAACCGTGCCGCGAGGGCGGGTGCGGCGGCATAACGGCCGGCCGGGACGTCCTCGAACATCTCCTGTGTCACGTTCTTCGATGCGAGCAGGTCCAGGAAGTTCTCCCTGTAGCCGGTGTTGTCGTTGCTTAG
108	DEFL5-3	meiillwvrlllcflvschildg IGNSAYTAWSKKLGSEHGMCCLRIPFCIINLPEVANVCFFNFLC	Non-AMP	7.115				ATGGAAATCATTCTTTTATGGGTTCGGCTCCTTCTTTGCTTCCTGGTTTCTTGCCACATTCTTGATGGTATCGGTAATTCCGCCTATACTGCCTGGTCCAAGAAACTTGGAAGTGAGCACGGCATGTGTTGCTTACGCATTCCTTTTTGTATCATCAACCTTCCTGAAGTAGCGAATGTTTGTTTTTTCAATTTCCTATGCTAA
109	DEFL5-4	mtllclccahelffsrpclg SWKHECKLLYLPSRQCFVTVDCTIVYRPVFVSLCASYLCTPSVLKNMSHAQYSDVFAEKPLNF	Non-AMP	7.472				ATGACTCTGCTTTGTTTGTGCTGCGCTCATGAACTTTTTTTCAGTAGACCCTGCTTGGGAAGTTGGAAACATGAATGTAAACTTTTGTATTTACCTTCCAGACAATGCTTTGTGACGGTTGACTGTACAATTGTATATAGACCTGTCTTCGTATCCCTCTGTGCTTCTTACCTATGTACTCCCTCCGTCCTGAAAAACATGTCGCACGCGCAGTACAGTGATGTTTTTGCGGAAAAGCCCTTGAACTTCTAA
110	DEFL5-5	mrclflwlalptpmwwrkrra EEEKISQPNVLTIFYSASGRWPVASIRWCSHCRRSITCRSSIKGASSNLVQLKTCEMTYSSCSR	AMP	8.622				ATGCGATGTTTGTTTTTGTGGCTGGCATTGCCAACACCAATGTGGTGGAGGAAACGGCGGGCAGAAGAAGAAAAGATCTCCCAACCGAATGTACTTACCATCTTCTATTCCGCCAGCGGTCGCTGGCCCGTCGCGTCAATCAGATGGTGTTCCCATTGTCGCCGATCGATAACGTGTCGGTCCAGCATCAAAGGAGCATCGTCTAATCTAGTCCAGTTAAAGACATGTGAAATGACCTACAGTTCTTGTTCGCGTTGA
111	DEFL5-6	mhfavfcllaascsg CSIHPFCRAACRQRSSLDRVLGSAVACRRPIC	AMP	9.043				ATGCACTTTGCAGTTTTCTGTCTGCTAGCTGCCTCATGCAGTGGCTGCAGCATCCATCCATTTTGCCGCGCAGCATGCAGACAGCGCAGTTCACTTGATCGAGTTCTTGGATCAGCAGTGGCCTGCCGCCGGCCGATCTGTTGA
112	DEFL5-7	mlmhhlisfmiplglsrflfa HCMINDEVLHVIWWPLKFPANICDVYHLCPMIIIRWLKCLAPLRCIAV	Non-AMP	7.14				ATGTTAATGCATCATTTAATCTCCTTTATGATTCCGCTAGGCCTTTCTCGTTTTCTCTTTGCACATTGCATGATAAACGATGAAGTTCTGCATGTTATATGGTGGCCTCTAAAATTTCCAGCTAACATTTGTGATGTATATCATCTCTGTCCCATGATAATAATCCGATGGCTCAAGTGTTTGGCACCCCTGAGATGTATTGCAGTTTAG
113	DEFL5-8	mmiicslymllpwpgpsqvia MYPCAPHSLYLFTVTKQAWKVLNWNIRGINSPDKWLHIQNKIDESGCSMVCFQEIKKEIIDISFIRKFCLARFDCFAYLPSGGLLTVWASSQFSGEVLFQNEYALSVAFNRPDVAHVGPY	Non-AMP	7.325				ATGATGATTATCTGCAGTTTGTATATGTTGTTGCCTTGGCCTGGTCCCTCTCAGGTCATTGCTATGTACCCTTGTGCACCCCACTCCCTCTATTTGTTCACAGTGACCAAGCAAGCTTGGAAAGTACTTAACTGGAACATAAGAGGCATCAATTCTCCAGATAAATGGCTGCATATCCAGAATAAGATTGATGAGAGTGGTTGTTCTATGGTCTGTTTTCAGGAAATCAAGAAAGAAATTATAGACATTTCCTTCATCAGAAAATTCTGCCTAGCCAGATTTGATTGTTTTGCTTATTTACCATCAGGAGGATTACTAACTGTCTGGGCCTCATCTCAATTTTCTGGAGAAGTGCTCTTTCAGAATGAATATGCCCTCTCAGTTGCTTTCAATCGACCA…
114	DEFL5-9	mhpklflmetplclllptsrg RQWARPCYRPCMLLRPCSWLPRRARASSSCQKIGHHCRSASPDVPVQLRK	AMP	11.386				ATGCATCCAAAATTGTTCCTGATGGAGACACCACTCTGCTTGTTGCTACCTACATCCCGTGGAAGACAGTGGGCACGGCCTTGCTATAGACCCTGCATGTTGCTGCGGCCGTGCTCCTGGCTACCTAGGCGTGCCCGTGCCTCTAGCTCCTGCCAGAAAATTGGCCACCATTGCAGGTCAGCTTCTCCTGATGTGCCAGTCCAGCTGCGAAAATGA
115	DEFL5-10	mlvllnvliypapvlv TPMYLHCSQFPNIAIPHIRDLSEHVREAMVFGKMVMVCLGLNCHRDQMELVWTVDTGRIFCLIIFYCQLFEKVLPPY	Non-AMP	6.244				ATGTTAGTTTTACTTAACGTCTTGATTTATCCTGCTCCAGTGCTTGTAACACCAATGTATTTGCACTGCTCCCAGTTTCCTAACATTGCTATCCCCCACATCCGTGATCTGTCAGAGCACGTCAGAGAAGCAATGGTGTTTGGCAAAATGGTTATGGTATGCTTAGGTCTGAACTGTCATCGAGACCAGATGGAACTTGTCTGGACAGTGGACACTGGTCGCATATTCTGCCTAATAATTTTTTACTGCCAGTTGTTTGAAAAGGTTTTACCGCCATATTAG
116	DEFL5-11	mprlicsffrlssfiglclg NPGRFCSLQLSHVISFFSLINLFSLGLSYPVSFFCPRLCYQRNPYSLFLGCFFRLCLGFSSFLSLASFNKRISLISLHHPNLRHPS	AMP	9.391				ATGCCACGCCTCATCTGTAGCTTCTTTCGCCTTAGCAGCTTCATCGGCCTTTGCCTTGGCAATCCTGGTAGATTCTGCAGCCTCCAACTTAGCCATGTTATCAGCTTCTTCAGTCTCATCAACCTCTTTAGCCTCGGACTCAGCTATCCTGTCAGCTTCTTCTGCCCACGACTCTGCTATCAGAGGAACCCCTACAGCCTCTTCCTTGGCTGCTTTTTCAGACTTTGCCTTGGCTTCAGCAGCTTCTTGAGCCTTGCGTCGTTCAACAAACGGATTTCTCTCATTTCGCTTCATCACCCGAATCTTAGACACCCTTCGTAA
117	DEFL5-12	mptmllrvpsillalilrsvarc QSTRGTGCRPAAAPTSLPWGHSSPTKAPPQMCRLICQGKVRLRPSMECPTAPCSFRIQVQHK	AMP	10.675				ATGCCAACAATGCTGCTGCGGGTGCCATCGATCTTGCTCGCGCTTATACTCCGCTCAGTTGCGCGCTGCCAAAGTACCCGAGGCACGGGCTGTCGGCCGGCAGCGGCCCCGACCAGTCTTCCTTGGGGGCATTCTTCTCCAACAAAAGCTCCTCCTCAAATGTGCAGGTTAATTTGCCAGGGGAAGGTTCGACTTCGACCATCGATGGAATGCCCCACGGCGCCGTGCAGTTTCAGGATTCAAGTGCAGCACAAATGA
118	DEFL5-13	mflllvvdaflplmvvvvg VGWHAAHHVHPLGLERSIRTAPHEQRRGGNLVLDRGNVGACLEPCREGGCGGITAGRDVLEHLLCHVLRCEQVQEVLPVAGVVVA	Non-AMP	6.645				ATGTTCTTGCTGCTGGTGGTTGATGCCTTCCTTCCTCTGATGGTGGTGGTCGTCGGCGTAGGATGGCATGCCGCTCATCATGTTCATCCCCTGGGCCTCGAGCGCAGCATTAGAACCGCTCCCCATGAACAACGGCGAGGCGGCAACCTCGTACTTGATCGGGGAAACGTCGGAGCCTGCCTCGAACCGTGCCGCGAGGGCGGGTGCGGCGGCATAACGGCCGGCCGGGACGTCCTCGAACATCTCCTGTGTCACGTTCTTCGATGCGAGCAGGTCCAGGAAGTTCTCCCTGTAGCCGGTGTTGTCGTTGCTTAG
MOTIF: C[ABD-Z]{4,29}C[ABD-Z]{0,30}C[ABD-Z]{3,5}C[ABD-Z]{9,15}C[ABD-Z]{4,5}C
#	Name	Signaling sequence {15,19}| mature sequence {34,79}	AMP prediction	pI calculated	BLAST homology (if present, the first hit is indicated)	Accession	% identity	Nucleotide sequence
119	DEFL6-1	mhvcmlvllslqsilllls YPGCFVAINICPMFCFLGCLLLQSILLLCQMFTC	Non-AMP	4.604				ATGCATGTTTGCATGCTTGTGCTTCTGTCACTACAATCTATACTACTGCTATTGTCATATCCTGGTTGTTTTGTTGCTATCAATATTTGTCCCATGTTTTGTTTCCTTGGATGCTTACTACTACAATCTATACTACTATTGTGCCAGATGTTCACATGTTAA
120	DEFL6-2	mhvcmlvllslqsilllls YPGCFVAINICPMFCFLACLLLQSILLLCKMFTC	Non-AMP	6.967				ATGCATGTTTGCATGCTTGTGCTTCTGTCACTACAATCTATACTACTGCTATTGTCATATCCTGGTTGTTTTGTTGCTATCAATATCTGTCCCATGTTTTGTTTCCTTGCATGCTTACTACTACAATCTATACTACTATTGTGCAAGATGTTCACATGTTAA
121	DEFL6-3	mciitalvrapivfs SLLCVQHPLLKLMPSEIETGNGSAGSPEQYQPVCVTGATNSSTPCSGRASCPRHSEGLRMCHLLVLCRLVLNINQYGTS	AMP	7.076				ATGTGCATAATTACAGCTCTAGTAAGAGCGCCCATAGTTTTTTCTTCCCTTCTCTGCGTTCAGCACCCTCTCCTAAAGTTGATGCCAAGCGAGATTGAGACAGGCAACGGCAGCGCTGGCTCGCCGGAGCAGTACCAGCCGGTGTGCGTGACCGGAGCCACCAACTCATCCACACCCTGCTCCGGCAGGGCGTCTTGTCCACGCCACAGCGAAGGACTCAGGATGTGTCACCTATTGGTTCTTTGCAGGTTGGTGCTGAATATCAATCAATATGGAACCTCATGA
122	DEFL6-4	mellavpfvlmqtcta YLTWQIFLTNSQLEMEYCIQTRCCHSFPCASVKQARLACSHSLLCQTLERLIQ	Non-AMP	7.018				ATGGAACTACTTGCGGTGCCATTTGTCTTAATGCAGACATGCACTGCTTACTTAACTTGGCAAATCTTTTTAACAAACTCTCAACTAGAGATGGAATATTGCATCCAGACAAGGTGCTGTCATTCTTTTCCTTGTGCATCAGTGAAACAAGCAAGGTTAGCATGCTCTCATTCTTTACTTTGTCAGACTCTGGAGAGACTGATTCAGTAG
123	DEFL6-5	mwvwlgrasvalfpada VTKLCQKQLRNCFPIHAVTGTFKRIPHLTLVHLLGVRKHLIRCSPSVCRDATQKQNSREHGLRCSVSLSCRIISG	AMP	10.824				ATGTGGGTTTGGCTGGGAAGAGCCAGTGTGGCACTCTTTCCTGCAGACGCCGTGACGAAGTTATGTCAAAAGCAATTGAGGAATTGTTTCCCAATACATGCCGTCACTGGAACATTCAAAAGAATTCCACATCTCACCTTGGTGCACTTGCTGGGGGTTCGAAAGCATTTAATAAGATGTTCACCAAGTGTATGCAGGGATGCGACACAGAAGCAGAATTCGAGGGAACATGGGCTGCGATGCTCCGTGAGTTTAAGTTGCAGGATAATAAGTGGCTGA
124	DEFL6-6	mwvwlgrasvalfrada VTKLCQMQLRNCFPIHAVTGTFKRIPHLTLVHLLGVRKHLIRCSPSVCRDATQKQNSREHGLRCSVSLSCRIISG	AMP	10.725				ATGTGGGTTTGGCTGGGAAGAGCCAGTGTGGCACTCTTTCGTGCAGACGCAGTGACGAAGTTATGTCAAATGCAATTAAGGAATTGTTTCCCAATACATGCCGTCACTGGAACATTCAAAAGAATTCCACATCTCACCTTGGTGCACTTGCTGGGGGTTCGAAAGCATTTAATAAGATGTTCACCAAGTGTATGCAGGGATGCGACACAGAAGCAGAATTCGAGGGAACATGGGCTGCGATGCTCCGTGAGTTTAAGTTGCAGGATAATAAGTGGCTGA
125	DEFL6-7	mhvcmlvllslqsilllls YPGCFVAINICPMFCFLACLLLQSILLLCQMFTC	Non-AMP	4.604				ATGCATGTTTGCATGCTTGTGCTTCTGTCACTACAATCTATACTACTGCTATTGTCATATCCTGGTTGTTTTGTTGCTATCAATATCTGTCCCATGTTTTGTTTCCTTGCATGCTTACTACTACAATCTATACTACTATTGTGCCAGATGTTCACATGTTAA
MOTIF: C[ABD-Z]{0,12}C[ABD-Z]{0,13}C[ABD-Z]{2,8}C[ABD-Z]{3,7}C[ABD-Z]{4,11}C[ABD-Z]{1,6}C
#	Name	Signaling sequence {17,26}| mature sequence {34,63}	AMP prediction	pI calculated	BLAST homology (if present, the first hit is indicated)	Accession	% identity	Nucleotide sequence
126	DEFL7-1	mptmllrvpsillalilrsaa RCQSTRGTGCRPAVALSSLPWGHCSSTRAPLMCKLICRGKVRLRPSMGCHTAPCSSRIRVRRK	AMP	11.755				ATGCCAACAATGCTGCTGCGGGTGCCATCGATCTTGCTCGCGCTTATACTCCGCTCGGCGGCGCGCTGCCAAAGTACCCGAGGCACGGGCTGTCGGCCGGCAGTGGCCCTGAGCAGTCTTCCTTGGGGGCATTGTTCCTCAACAAGAGCTCCTCTAATGTGCAAGTTAATTTGCCGGGGGAAAGTTCGACTTCGACCATCGATGGGATGCCACACGGCGCCGTGCAGTTCCAGGATTCGAGTGCGGCGCAAATGA
127	DEFL7-2	mhlttclylftlifsyc LPVLSPLPAPYLCVLALACCMRRLISSCAVLCPVSALTLFALVCTPFICMEHV	Non-AMP	6.935				ATGCATCTTACTACATGTTTGTATTTATTTACATTGATATTTTCTTACTGCTTGCCTGTCCTTTCTCCTCTCCCTGCGCCCTACTTGTGTGTTCTTGCTCTTGCTTGTTGCATGCGCAGGTTAATTTCTTCTTGTGCTGTCCTGTGTCCTGTGTCCGCCCTCACATTGTTCGCGTTAGTCTGCACTCCGTTCATTTGCATGGAACATGTTTGA
128	DEFL7-3	mgmhvagpvhmtlpdllcwfssmlhg HACCHVCLTCSWTRCLLDFSGGLRFCFLFPVGCL	AMP	6.942				ATGGGCATGCATGTCGCTGGCCCAGTTCACATGACCCTTCCAGATTTGCTGTGTTGGTTCTCCTCCATGCTGCATGGCCATGCATGTTGCCACGTTTGTCTCACATGCAGTTGGACACGTTGCCTTCTGGACTTTTCTGGTGGGCTTCGTTTTTGTTTTCTCTTTCCTGTTGGCTGCCTATAA
MOTIF: C[ABD-Z]{0,32}C[ABD-Z]{2,10}C[ABD-Z]{0,13}C[ABD-Z]{3,33}C[ABD-Z]{3,4}C[ABD-Z]{9,16}C[ABD-Z]{4,5}C
#	Name	Signaling sequence {21,26}| mature sequence {66,107}	AMP prediction	pI calculated	BLAST homology (if present, the first hit is indicated)	Accession	% identity	Nucleotide sequence
129	DEFL8-1	mgsskrngsallclllagllllavta VKVEAGWGCVDRCVEGGGADAYACSFVCIWNLRRDGGTGAGSSAKMRGEILPVELKGEREDCIERCMDLGLDFFECLFHVC	Non-AMP	4.461				ATGGGTTCTTCCAAGCGTAATGGCAGCGCTCTGTTGTGCCTCCTGCTCGCCGGGCTTCTACTGCTGGCCGTGACGGCGGTGAAGGTGGAGGCCGGATGGGGCTGCGTTGATAGATGCGTCGAGGGAGGTGGTGCGGACGCCTACGCGTGCTCTTTTGTCTGCATCTGGAATCTCCGGCGTGACGGCGGCACTGGCGCCGGCAGCTCGGCCAAGATGCGGGGAGAAATCCTTCCGGTGGAACTGAAAGGAGAGAGGGAAGACTGCATCGAAAGATGCATGGATTTAGGACTGGACTTCTTTGAGTGCTTGTTTCATGTGTGCTGA
130	DEFL8-2	mlcpsaafghlilpailhiqlg IPSSTSPNTPIIYFDRLCYLVHGSGILIEEQDVGQKLAAIAQLPGMEIPSCIACCVAQCLLPHCFNYRHLIYELQLHLEHCVSKGACFHQHSFPRVIVPTWMHPVPI	Non-AMP	6.198				ATGCTCTGTCCGTCAGCAGCTTTCGGTCATCTCATCCTTCCAGCCATTCTCCACATCCAGCTCGGCATCCCTAGCAGCACTAGCCCCAACACTCCCATCATCTACTTCGACCGGCTTTGCTATCTTGTGCATGGCAGCGGCATATTGATTGAGGAGCAGGATGTGGGTCAGAAACTCGCCGCCATTGCTCAGCTGCCTGGCATGGAAATCCCCAGTTGCATTGCTTGCTGCGTAGCACAATGTCTCCTTCCACACTGTTTCAATTATCGCCATCTTATCTACGAGCTCCAACTCCATCTTGAGCATTGTGTGAGCAAGGGTGCATGCTTTCACCAGCACAGCTTCCCCCGGGTAATTGTCCCAACTTGGATGCATCCAGTCCCCATATAG
131	DEFL8-3	mfgvhvlvvrnlklvlvvnqtvc DVPPSISVLVCSMESLCLQREECHVSSMIKKEKTEWCVGTTAMHALHATTVIDRKNCLFFCLVFLTWYRCKRLYTCVYILGRL	Non-AMP	7.58				ATGTTCGGCGTGCATGTGTTAGTCGTGCGGAATCTAAAGCTGGTGCTGGTGGTTAATCAAACTGTTTGTGACGTGCCCCCTAGTATAAGTGTTCTGGTGTGTTCCATGGAATCCCTTTGCTTGCAACGAGAGGAGTGCCACGTCAGTTCCATGATAAAGAAAGAAAAGACAGAGTGGTGCGTCGGAACCACTGCCATGCATGCACTGCACGCAACGACCGTTATTGACCGCAAAAATTGCCTTTTCTTTTGTCTAGTTTTCTTAACATGGTACAGATGTAAGCGCTTATATACATGCGTATACATTCTCGGTCGATTGTGA
132	DEFL8-4	mpailllvpsiflalilrlaa RRRCCQSTRGMGCPRAAAPSSPPWGHCSSTRAPLMCKLICRGKVRLRPSMGCHTAPCSSRIRVRRK	AMP	11.814				ATGCCAGCAATTCTGCTGCTGGTGCCGTCGATCTTTCTCGCGCTTATACTCCGCTTGGCGGCGCGCCGGCGGTGCTGCCAAAGTACCCGCGGTATGGGTTGTCCGCGGGCAGCGGCGCCGAGCAGTCCTCCTTGGGGGCATTGTTCCTCAACAAGAGCTCCTCTAATGTGCAAGTTAATTTGCCGGGGGAAAGTTCGACTTCGACCATCGATGGGATGCCACACGGCGCCGTGCAGTTCCAGGATTCGAGTGCGGCGCAAATGA
MOTIF: C[ABD-Z]{9}C[ABD-Z]{8,9}CC[ABD-Z]{7}C[ABD-Z]C[ABD-Z]{9}C[ABD-Z]{5}C[ABD-Z]{17}C[ABD-Z]{5}C
#	Name	Signaling sequence {26,27}| mature sequence {79,80}	AMP prediction	pI calculated	BLAST homology (if present, the first hit is indicated)	Accession	% identity	Nucleotide sequence
133	DEFL9-1	masvklaaalalvavcaalaatpata FPPESCATQGSYFINCLRRGFGERCCAMVENPRCFCQVEREAEIRCVPGRSCPSRGIAKVVKIAEMHLSCMRNLKCKRA	AMP	8.206	uncharacterized protein LOC109760732 [Aegilops tauschii subsp. tauschii]	XP_020175127.1	99	ATGGCGTCCGTGAAGCTCGCCGCCGCGCTCGCTCTTGTCGCCGTGTGCGCCGCGCTCGCGGCGACGCCGGCCACGGCGTTCCCGCCCGAGAGCTGCGCGACGCAGGGTAGCTACTTCATCAACTGCCTTCGGCGCGGGTTCGGCGAGAGGTGCTGCGCCATGGTGGAGAACCCCAGGTGCTTCTGCCAGGTGGAGCGGGAGGCCGAGATCCGGTGCGTGCCCGGGCGGAGCTGCCCGAGCCGTGGCATTGCCAAGGTCGTCAAGATCGCCGAGATGCATCTCTCCTGCATGAGGAACCTCAAGTGCAAGCGTGCCTAA
134	DEFL9-2	masvklaaaalavvlacaalaatpaaa YQFEPEPCKKQAMYFKNCLPLVAEPEKCCSVVANPACFCEVEREVEIQCAPGHHCSRADKKVKIAEMNLPCLQNLKCKHA	Non-AMP	6.973	hypothetical protein F775_43889 [Aegilops tauschii]	EMT10402.1	74	ATGGCGTCTGTGAAGCTCGCCGCCGCCGCGCTGGCCGTCGTCCTCGCGTGCGCCGCGCTCGCCGCGACGCCGGCGGCGGCGTACCAGTTCGAGCCCGAGCCCTGCAAGAAGCAGGCCATGTACTTCAAGAACTGCCTCCCCCTCGTCGCCGAGCCCGAGAAGTGCTGTAGCGTGGTGGCGAACCCGGCGTGCTTCTGCGAGGTGGAGCGGGAGGTGGAGATCCAGTGCGCGCCCGGCCACCACTGCAGTCGCGCCGACAAGAAGGTCAAGATCGCCGAGATGAACCTCCCCTGCCTCCAGAACCTCAAGTGCAAGCACGCGTGA
135	DEFL9-3	masvklaaalalvavcaalaatpata YPPPESCATQGSYFINCLRRGFGERCCAMVENPRCFCQVEREAEIRCVPGRSCPSRGIAKVVKVAEMHLSCMRNLKCKRA	AMP	8.184	hypothetical protein TRIUR3_31661 [Triticum urartu]	EMS53941.1	98	ATGGCGTCCGTGAAGCTCGCCGCCGCGCTCGCTCTTGTCGCCGTGTGCGCCGCGCTCGCGGCGACGCCGGCCACGGCGTACCCGCCGCCCGAGAGCTGCGCGACGCAGGGCAGCTACTTCATCAACTGCCTTCGCCGCGGGTTCGGCGAGAGGTGCTGCGCCATGGTGGAGAACCCCAGGTGCTTCTGCCAGGTGGAGCGGGAGGCCGAGATCCGGTGCGTGCCCGGGCGGAGCTGCCCGAGCCGTGGCATTGCCAAGGTCGTGAAGGTCGCCGAGATGCACCTCTCCTGCATGAGGAACCTCAAGTGCAAGCGTGCCTAA
136	DEFL9-4	masvklaaalalvavcaalaatpata FPPESCATQGSYFINCLRRGFGERCCAMVENPRCFCQVEREAEIRCVPGRSCPSRGIAKVVKVAEMHLSCMRNLKCKRA	AMP	8.206	uncharacterized protein LOC109760732 [Aegilops tauschii subsp. tauschii]	XP_020175127.1	100	ATGGCGTCCGTGAAGCTCGCCGCCGCGCTCGCTCTTGTCGCCGTGTGCGCCGCGCTCGCGGCGACGCCGGCCACGGCGTTCCCGCCCGAGAGCTGCGCGACGCAGGGCAGCTACTTCATCAACTGCCTTCGCCGCGGGTTCGGCGAGAGGTGCTGCGCCATGGTGGAGAACCCCAGGTGCTTCTGCCAGGTGGAGCGGGAGGCCGAGATCCGCTGCGTGCCCGGGCGGAGCTGCCCCAGCCGTGGCATTGCCAAGGTCGTGAAGGTCGCCGAGATGCATCTCTCCTGCATGAGGAACCTCAAGTGCAAGCGTGCCTAA
137	DEFL9-5	masvklaaalalvavcaalaatpata YPPPESCATQGSYFINCLRRGFGERCCAMVENPRCFCQVEREAEIRCVPGRSCPSRGIAKVVKIAEMHLSCMRNLKCKRA	AMP	8.184	hypothetical protein TRIUR3_31661 [Triticum urartu]	EMS53941.1	99	ATGGCGTCCGTGAAGCTCGCCGCCGCGCTCGCTCTTGTCGCCGTGTGCGCCGCGCTCGCGGCGACGCCGGCCACGGCGTACCCGCCGCCCGAGAGCTGCGCGACGCAGGGCAGCTACTTCATCAACTGCCTTCGCCGCGGGTTCGGCGAGAGGTGCTGCGCCATGGTGGAGAACCCCAGGTGCTTCTGCCAGGTGGAGCGGGAGGCCGAGATCCGGTGCGTGCCCGGGCGGAGCTGCCCGAGCCGTGGCATTGCCAAGGTCGTCAAGATCGCCGAGATGCACCTCTCCTGCATGAGGAACCTCAAGTGCAAGCGTGCCTAA
MOTIF: C[ABD-Z]{9}C[ABD-Z]{5,6}C[ABD-Z]{2}CC[ABD-Z]{8}C[ABD-Z]C[ABD-Z]{9}C[ABD-Z]{5}C[ABD-Z]{15}C[ABD-Z]{5}C
#	Name	Signaling sequence {22,29}| mature sequence {81,84}	AMP prediction	pI calculated	BLAST homology (if present, the first hit is indicated)	Accession	% identity	Nucleotide sequence
138	DEFL10-1	masvkiavvllacatlmataaa YAPYRPEPEPCKTQAMYFKNCLLLVSECEKCCTGVVADPACFCEVEREAEIQCAPGHHCSRADKKVKIAEMNLPCMKNLKCKRA	Non-AMP	7.201	uncharacterized protein LOC109765613 [Aegilops tauschii subsp. tauschii]	XP_020179991.1	97	ATGGCGTCCGTGAAGATCGCCGTCGTCCTCTTGGCGTGCGCCACGCTCATGGCGACGGCGGCGGCGTACGCGCCGTACCGGCCCGAGCCCGAGCCCTGCAAGACGCAGGCCATGTACTTCAAGAACTGCCTCCTCCTCGTCAGTGAGTGCGAGAAGTGCTGCACAGGCGTGGTGGCGGACCCCGCGTGCTTCTGCGAGGTGGAGCGAGAGGCCGAGATCCAGTGCGCGCCCGGCCACCACTGCAGTCGCGCCGACAAGAAGGTCAAGATCGCCGAGATGAACCTCCCCTGCATGAAGAACCTCAAGTGCAAGCGTGCGTGA
139	DEFL10-2	masvklaaaalavvlacaalaatpaatya EYRPEPEPCKTQAMYFKNCLRLGHCEKCCFGVVANPACYCEVEREALIECAPGHHCSRADKKVKIAEMNLPCLQNLKCKHA	Non-AMP	7.175	hypothetical protein TRIUR3_19916 [Triticum urartu]	EMS59881.1	98	ATGGCGTCTGTGAAGCTCGCCGCCGCCGCGCTGGCCGTCGTGCTCGCGTGTGCTGCGCTCGCCGCGACGCCGGCGGCGACGTATGCGGAGTACCGGCCGGAGCCCGAGCCCTGCAAGACGCAGGCCATGTACTTCAAGAACTGCCTCCGCCTCGGCCACTGCGAGAAGTGCTGCTTCGGGGTGGTGGCCAACCCGGCGTGCTACTGCGAGGTGGAGCGGGAGGCGCTGATCGAGTGCGCGCCTGGCCACCACTGCAGTCGCGCCGACAAGAAGGTCAAGATCGCCGAGATGAACCTCCCCTGCCTCCAGAACCTCAAGTGCAAGCACGCGTGA
140	DEFL10-3	masvklaaaalavvlacaalaatpaatya EYRPEPEPCKTQAMYFKNCLRLGHCEKCCFGVVANPACYCEVEREALIECAPGHHCSRADKKVKIAEMNLPCMKNLKCKRA	Non-AMP	7.635	hypothetical protein TRIUR3_19916 [Triticum urartu]	EMS59881.1	99	ATGGCGTCTGTGAAGCTCGCCGCCGCCGCGCTGGCCGTCGTGCTCGCGTGTGCTGCGCTCGCCGCGACGCCGGCGGCGACGTATGCGGAGTACCGGCCGGAGCCCGAGCCCTGCAAGACGCAGGCCATGTACTTCAAGAACTGCCTCCGCCTCGGCCACTGCGAGAAGTGCTGCTTCGGGGTGGTGGCCAACCCGGCGTGCTACTGCGAGGTGGAGCGGGAGGCGCTGATCGAGTGCGCGCCTGGCCACCACTGCAGTCGCGCCGACAAGAAGGTCAAGATCGCCGAGATGAACCTCCCCTGCATGAAGAACCTCAAGTGCAAGCGTGCGTGA
141	DEFL10-4	masvkiavvllacatlmataaa YAPYRPEPEPCKTQAMYFKNCLRLGHCEKCCFGVVANPACYCEVEREALIECAPGHHCSRADKKVKIAEMNLPCLQNLKCKHA	Non-AMP	7.348	uncharacterized protein LOC109765613 [Aegilops tauschii subsp. tauschii]	XP_020179991.1	86	ATGGCGTCCGTGAAGATCGCCGTCGTCCTCTTGGCGTGCGCCACGCTCATGGCGACGGCGGCGGCGTACGCGCCGTACCGGCCCGAGCCCGAGCCCTGCAAGACGCAGGCCATGTACTTCAAGAACTGCCTCCGCCTCGGCCACTGCGAGAAGTGCTGCTTCGGGGTGGTGGCCAACCCGGCGTGCTACTGCGAGGTGGAGCGGGAGGCGCTGATCGAGTGCGCGCCTGGCCACCACTGCAGTCGCGCCGACAAGAAGGTCAAGATCGCCGAGATGAACCTCCCCTGCCTCCAGAACCTCAAGTGCAAGCACGCGTGA
142	DEFL10-5	masvkiavvllacatlmataaa YAPYRPEPEPCKTQAMYFKNCLRLGHCEKCCFGVVANPACYCEVEREALIECAPGHHCSRADKKVKIAEMNLPCMKNLKCKHA	Non-AMP	7.524	uncharacterized protein LOC109765613 [Aegilops tauschii subsp. tauschii]	XP_020179991.1	88	ATGGCGTCCGTGAAGATCGCCGTCGTCCTCTTGGCGTGCGCCACGCTCATGGCGACGGCGGCGGCGTACGCGCCGTACCGGCCCGAGCCCGAGCCCTGCAAGACGCAGGCCATGTACTTCAAGAACTGCCTCCGCCTCGGCCACTGCGAGAAGTGCTGCTTCGGGGTGGTGGCCAACCCGGCGTGCTACTGCGAGGTGGAGCGGGAGGCGCTGATCGAGTGCGCGCCTGGCCACCACTGCAGTCGCGCCGACAAGAAGGTCAAGATCGCCGAGATGAACCTCCCCTGCATGAAGAACCTCAAGTGCAAGCACGCGTGA
143	DEFL10-6	masvkiavvllacatlmataaa YAPYRPEPEPCKTQAMYFKNCLLLVSECEKCCTGVVADPACFCEVEREAEIQCAPGHHCSRADKKIKIHEMNLSCMKNLKCKRA	Non-AMP	7.217	uncharacterized protein LOC109765613 [Aegilops tauschii subsp. tauschii]	XP_020179991.1	100	ATGGCGTCCGTGAAGATCGCCGTCGTCCTCTTGGCGTGCGCCACGCTCATGGCGACGGCGGCGGCGTACGCGCCGTACCGGCCCGAGCCCGAGCCCTGCAAGACGCAGGCCATGTACTTCAAGAACTGCCTCCTCCTCGTCAGTGAGTGCGAGAAGTGCTGCACAGGCGTGGTGGCGGACCCCGCGTGCTTCTGCGAGGTGGAGCGAGAGGCCGAGATCCAGTGCGCGCCCGGCCACCACTGCAGCCGCGCCGACAAGAAGATCAAGATCCACGAGATGAACCTCTCCTGCATGAAGAACCTCAAGTGCAAGCGTGCGTGA
