# Supplementary material for: Defensin-like peptides in wheat analyzed by whole-transcriptome sequencing: a focus on structural diversity and role in induced resistance
Source: PeerJ. 2019 Jan 8;7:e6125. doi: 10.7717/peerj.6125 (PMC6329339; doi:10.7717/peerj.6125)
Supplement: Table S6 — DEFLs with identical mature defensin domain are colored similarly. Up-regulated genes are shown in orange, down-regulated genes, in blue. For up-regulated genes, expression fold change was ≥2, for down-regulated genes, ≤0.5 when gene expression values were ≥ minimal expression threshold. Expression values for individual coding sequences were calculated as Counts per Million Mapped Reads (CPM) only for defensin sequences. Minimal expression threshold was defined as the minimal value of maximal CPM value of predicted defensins in four libraries. Abbreviations used: Ind, elicitor treated; Inf, infected with F. oxysporum; IR, elicitor-treated and infected with F. oxysporum IR-displaying. [file peerj-07-6125-s006.xlsx]

## Sheet: def
Names of DEFLs with identical mature peptide sequences are highlighted the same color	Fold change (≥2 is highlighted blue, ≤0,5 is highlighted orange when the gene expression signals ≥ Minimal expression threshold)
	Induced (Ind), infected (Inf), control (Cont) samples and sample with induced resistance (IR)
Name	Ind/Cont	Inf/Cont	IR/Cont	IR/Ind	IR/Inf	Inf/Ind
DEFL1-1	5.21753	0.984247	5.33159	1.02186	5.41692	0.188642
DEFL1-2	0.986742	1.51416	2.13612	2.16482	1.41076	1.5345
DEFL1-3	0.317206	0.239047	0.552679	1.74234	2.31201	0.753603
DEFL1-4	0.0585508	0.059257	0.0704093	1.20253	1.1882	1.01206
DEFL1-5	1.24149	0.637543	1.56664	1.26191	2.45731	0.513531
DEFL1-6	1.86151	0.833829	0.697871	0.374895	0.836947	0.447932
DEFL1-7	1.58821	0.701872	0.657205	0.413802	0.93636	0.441926
DEFL1-8	0.977433	0.486646	0.526902	0.539066	1.08272	0.497882
DEFL1-9	1.18274	0.621439	0.51006	0.431253	0.820772	0.525424
DEFL1-10	0.479666	0.235188	0.147755	0.308038	0.628245	0.490315
DEFL1-11	0.546249	2.28525	3.56873	6.53316	1.56164	4.18353
DEFL1-12	1.03845	2.37612	10.3002	9.91882	4.33489	2.28814
DEFL1-13	0.595781	0.666047	0.69325	1.1636	1.04084	1.11794
DEFL1-14	3.01931	1.08893	0.638526	0.211481	0.586377	0.360657
DEFL1-15	1.85757	1.36815	1.88101	1.01262	1.37486	0.736525
DEFL1-16	2.46964	1.14063	2.03285	0.823139	1.78222	0.461863
DEFL1-17	0.636733	0.715872	1.07719	1.69175	1.50473	1.12429
DEFL1-18	0.673853	0.744718	1.07188	1.59068	1.43932	1.10516
DEFL1-19	0.678807	0.760768	1.13937	1.6785	1.49766	1.12074
DEFL1-20	0.853367	0.590206	1.30051	1.52397	2.20348	0.691621
DEFL1-21	0.726588	0.749107	1.26194	1.7368	1.68459	1.03099
DEFL1-22	1.44804	0.481501	0.436468	0.301421	0.906474	0.33252
DEFL1-23	0.885188	0.600678	1.37189	1.54983	2.2839	0.678588
DEFL1-24	0.55932	1.92657	0.888911	1.58927	0.461395	3.44449
DEFL1-25	0.992037	1.59975	1.99931	2.01536	1.24977	1.61259
DEFL1-26	0.85209	1.2543	1.48224	1.73953	1.18172	1.47203
DEFL1-27	0.855461	1.28707	1.77792	2.07831	1.38137	1.50453
DEFL1-28	0.951401	1.54195	1.99751	2.09954	1.29544	1.62072
DEFL1-29	7.58664	2.73432	2.0585	0.271332	0.752837	0.360413
DEFL1-30	18.9666	1.09373	5.14624	0.271332	4.70523	0.0576661
DEFL1-31	0.820177	0.660179	1.17297	1.43015	1.77675	0.804922
DEFL1-32	0.521581	2.32273	3.59966	6.90144	1.54975	4.45325
DEFL1-33	1.40226	0.565016	0.574082	0.409397	1.01605	0.402931
DEFL1-34	5.43885	1.10494	5.61016	1.0315	5.07733	0.203157
DEFL1-35	1.6185	0.693794	0.577547	0.35684	0.832448	0.428664
DEFL1-36	2.67616	1.05419	2.04894	0.765626	1.94361	0.393919
DEFL1-37	0.107327	0.0575206	0.0825763	0.769393	1.4356	0.53594
DEFL1-38	1.15245	0.662801	0.85631	0.743038	1.29196	0.575126
DEFL1-39	2.61227	0.792622	2.08749	0.799109	2.63365	0.303422
DEFL1-40	1.17288	0.682201	1.4019	1.19526	2.05497	0.581646
DEFL1-41	1.09943	1.35199	11.849	10.7775	8.76414	1.22972
DEFL1-42	0.621891	0.658378	0.716033	1.15138	1.08757	1.05867
DEFL1-43	1.04657	2.25686	10.2935	9.83555	4.56101	2.15644
DEFL1-44	1.48431	0.472436	0.480411	0.32366	1.01688	0.318287
DEFL1-45	0.871378	0.600295	1.31115	1.50469	2.18418	0.688903
DEFL1-46	0.618075	0.545727	0.575282	0.930763	1.05416	0.882945
DEFL1-47	0.849257	0.560306	1.02781	1.21025	1.83437	0.65976
DEFL1-48	1.31151	0.660829	1.46558	1.11748	2.2178	0.50387
DEFL1-49	1.34513	0.641714	1.24338	0.924351	1.93759	0.477063
DEFL1-50	3.15389	1.11839	2.43723	0.772767	2.17922	0.354607
DEFL1-51	0.805771	0.712901	1.13957	1.41426	1.5985	0.884743
DEFL1-52	1.02594	0.631756	0.50711	0.49429	0.802699	0.615785
DEFL2-1	1.04069	1.26157	0.971751	0.93376	0.770272	1.21225
DEFL2-2	1.08232	1.10543	0.885896	0.818515	0.801402	1.02135
DEFL2-3	1.594	1.25662	1.31393	0.8243	1.04561	0.788346
DEFL2-4	1.35327	1.27187	1.11701	0.825416	0.878247	0.939846
DEFL3-1	2.8765	1.34023	3.7372	1.29922	2.78848	0.465922
DEFL3-2	3.31915	1.91403	2.31581	0.697711	1.20992	0.576661
DEFL3-3	0.573166	1.1418	0.950076	1.65759	0.832083	1.9921
DEFL3-4	1.03952	0.462731	1.58346	1.52327	3.42198	0.445141
DEFL3-5	6.69837	3.28674	13.3329	1.99047	4.05658	0.490677
DEFL3-6	0.739431	0.697187	0.792515	1.07179	1.13673	0.942869
DEFL3-7	0.886222	0.859375	0.613468	0.692228	0.713854	0.969706
DEFL4-1	0.530657	0.780516	0.955313	1.80025	1.22395	1.47085
DEFL4-2	0.481823	1.15606	0.436938	0.906843	0.377953	2.39936
DEFL4-3	0.979678	1.46769	0.292458	0.298525	0.199264	1.49814
DEFL4-4	0.0894912	0.878406	0.669204	7.47788	0.761839	9.81556
DEFL4-5	1.64669	1.84645	0.416191	0.252743	0.2254	1.12131
DEFL4-6	1.38498	2.17787	0.919869	0.664173	0.422371	1.57249
DEFL4-7	11.1864	3.62978	3.96693	0.354621	1.09289	0.324481
DEFL4-8	3.78894	2.21299	2.55375	0.674	1.15398	0.584066
DEFL4-9	1.91115	1.55562	2.55545	1.33713	1.64272	0.813972
DEFL4-10	0.731371	1.31332	0.450676	0.616207	0.343158	1.7957
DEFL4-11	2.00186	0.655131	0.673075	0.336225	1.02739	0.327261
DEFL4-12	0.307883	1.1239	0.389256	1.2643	0.346345	3.65041
DEFL4-13	0.719126	1.40305	0.268664	0.373597	0.191486	1.95105
DEFL4-14	1.02732	1.55562	1.02253	0.995337	0.657315	1.51425
DEFL4-15	0.543057	1.34912	1.15391	2.12484	0.855302	2.48431
DEFL4-16	1.04908	1.67055	0.857101	0.817004	0.513065	1.5924
DEFL4-17	2.22788	1.53732	1.88708	0.847031	1.22752	0.690036
DEFL4-18	0.146048	0.742782	0.116507	0.79773	0.156852	5.08589
DEFL4-19	0.284745	0.950342	0.0878056	0.308366	0.0923937	3.33752
DEFL4-20	2.93792	1.42608	3.40654	1.15951	2.38875	0.485403
DEFL4-21	1.01378	1.42306	1.10945	1.09438	0.779625	1.40372
DEFL4-22	1.04772	1.30968	1.5785	1.5066	1.20526	1.25002
DEFL4-23	0.874531	0.776983	0.884374	1.01125	1.13822	0.888457
DEFL4-24	1.1257	1.13984	1.1137	0.989341	0.977061	1.01257
DEFL4-25	1.33109	1.33475	0.75409	0.566522	0.564966	1.00276
DEFL4-26	1.05765	0.947306	0.929134	0.878489	0.980817	0.895671
DEFL4-27	0.719715	1.23044	0.119466	0.165991	0.097092	1.70963
DEFL4-28	3.94084	2.16315	2.01275	0.510743	0.930472	0.548907
DEFL4-29	1.12219	0.510407	0.90917	0.810174	1.78127	0.454831
DEFL4-30	1.21713	1.22082	1.292	1.06151	1.05831	1.00303
DEFL4-31	1.48853	1.66366	1.40546	0.944197	0.844803	1.11765
DEFL4-32	3.35857	1.89041	2.011	0.598766	1.06379	0.562862
DEFL4-33	0.457086	1.16939	0.419249	0.917222	0.358519	2.55836
DEFL4-34	2.20161	1.40036	2.7221	1.23641	1.94385	0.636063
DEFL4-35	3.23086	1.46077	3.52897	1.09227	2.41583	0.452131
DEFL4-36	0.324084	0.32808	0.392492	1.21108	1.19633	1.01233
DEFL4-37	0.10193	0.892961	0.0512772	0.503064	0.0574238	8.76055
DEFL4-38	0.312986	0.978342	0.130652	0.417436	0.133544	3.12584
DEFL4-39	0.756197	0.820201	1.02048	1.34949	1.24418	1.08464
DEFL4-40	0.23027	0.495358	0.334651	1.4533	0.675574	2.1512
DEFL4-41	0.506496	1.16286	0.449255	0.886985	0.386335	2.2959
DEFL4-42	0.0704531	0.128379	0.122867	1.74396	0.957064	1.82219
DEFL5-1	1.23721	0.843045	1.83603	1.48401	2.17785	0.681411
DEFL5-2	1.09234	1.28191	1.62869	1.49101	1.27052	1.17354
DEFL5-3	0.496086	0.795074	0.965989	1.94722	1.21497	1.6027
DEFL5-4	1.22439	1.23858	1.15409	0.942584	0.931788	1.01159
DEFL5-5	1.84491	1.8385	1.74018	0.943231	0.946522	0.996523
DEFL5-6	1.67459	2.19116	1.53841	0.918678	0.7021	1.30847
DEFL5-7	0.591033	0.354452	0.633464	1.07179	1.78716	0.599716
DEFL5-8	0.625769	0.565465	0.756183	1.20841	1.33728	0.903633
DEFL5-9	1.10638	0.828582	0.857707	0.775234	1.03515	0.74891
DEFL5-10	0.533662	0.747943	1.04533	1.95879	1.39761	1.40153
DEFL5-11	0.853685	1.43135	1.52498	1.78634	1.06541	1.67667
DEFL5-12	1.11922	0.811141	1.66353	1.48633	2.05085	0.724737
DEFL5-13	1.05918	1.2246	1.57205	1.48422	1.28373	1.15618
DEFL6-1	1.11962	1.17801	1.16606	1.04148	0.989858	1.05215
DEFL6-2	1.07705	1.06645	1.09681	1.01834	1.02847	0.990154
DEFL6-3	1.28681	1.08918	1.44414	1.12227	1.3259	0.846421
DEFL6-4	0.994356	1.08036	1.11034	1.11664	1.02775	1.08649
DEFL6-5	1.01226	1.01999	1.21428	1.19957	1.19048	1.00764
DEFL6-6	1.08469	0.907866	1.24452	1.14735	1.37081	0.836982
DEFL6-7	1.06951	1.13778	1.09072	1.01983	0.958635	1.06384
DEFL7-1	1.25489	0.903385	1.45986	1.16333	1.61599	0.719891
DEFL7-2	0	0.0503305	0	0	0	0
DEFL7-3	1.25541	2.08329	0.833201	0.66369	0.399944	1.65945
DEFL8-1	0.0106841	0.0486713	0	0	0	4.55549
DEFL8-2	37.9332	5.46864	40.1407	1.05819	7.34016	0.144165
DEFL8-3	1.39817	1.00159	1.12184	0.802368	1.12007	0.716358
DEFL8-4	1.25163	0.890137	1.40836	1.12522	1.58218	0.711184
DEFL9-1	1.219	0.985282	0.826523	0.678034	0.838869	0.808271
DEFL9-2	1.61029	0.585092	0.394388	0.244917	0.674061	0.363345
DEFL9-3	1.20913	1.1274	0.851637	0.704339	0.755397	0.93241
DEFL9-4	1.17377	0.955923	0.903586	0.769816	0.94525	0.814405
DEFL9-5	1.14282	0.825597	0.824677	0.721613	0.998885	0.722419
DEFL10-1	1.53917	0.710065	0.533485	0.346605	0.751319	0.461328
DEFL10-2	3.31138	1.11166	1.45107	0.438208	1.30532	0.335708
DEFL10-3	1.77812	0.760483	0.731732	0.41152	0.962193	0.42769
DEFL10-4	2.83376	0.796695	1.22774	0.433253	1.54104	0.281144
DEFL10-5	2.35976	0.797752	1.13514	0.48104	1.42292	0.338065
DEFL10-6	1.68257	0.764347	0.522401	0.310478	0.683461	0.454274
